# Supplementary material
Source: PubMed Central journal article supplement (PMC8754108)
Supplement: spectrum_01564-21_revised_supplemental-file.pdf [file spectrum_01564-21_revised_supplemental-file.pdf]

## Supplemental Online Content

### TEXT S1. MATERIALS AND METHODS

**Fig. S1.** Sensitivity and Specificity by Panel.

**Fig. S2.** Sensitivity and Specificity by Assay Type.

**Table S1.** Serology assay performance data for each evaluation

This supplemental material has been provided by the authors to give readers additional information about their work.

## **TEXT S1.**

### **1. Performance Evaluation Panels**

#### **1.1. Panel Samples**

Three evaluation panels were created; each panel composition and size were selected to provide reasonable estimates and confidence intervals for test performance in the context of limited sample availability for laboratory-based evaluations. The evaluation panels were composed of 30 anti-SARS-CoV-2 antibody positive serum samples from patients with confirmed SARS-CoV-2 infection by a nucleic acid amplification test, as well as 80 antibody negative peripheral blood samples, collected prior to December 1, 2019, which includes samples from 10 individuals living with HIV infection. HIV samples were included as those samples have previously demonstrated potential for cross-reactivity, particularly in the RBD assay. The samples were obtained from multiple sources (Mount Sinai Health System, The Biodefense and Emerging Infections Research Resources Repository (BEI), Vitalant, Northwestern University, Boca Biolistics, and CDC) and were collected under approved protocols. For each evaluation panel, samples were not randomly selected; rather, they were selected to maintain similar characteristics between panels, including sample SARS-CoV-2 spike IgM and IgG titer profile, days post symptom onset (17-46 days), and sample matrix (anti-SARS-CoV-2 antibody positive samples were all serum). Two laboratories (CDC and NCI-FNLCR) were used to confirm the presence or absence of anti-SARS-CoV-2 antibodies for IgM, IgG, and pan-Ig. All SARS-CoV-2 negative samples were serum or plasma obtained from blood collected into Anticoagulant Citrate Dextrose Solution, Solution A (ACD-A plasma). Samples from each panel were aliquoted in 50  $\mu$ L aliquots and frozen at -80°C until testing. All samples were subjected to no more than two freeze/thaw events prior to testing.

## 1.2. Serology Assays for Sample Characterization

The sequences used for both the RBD and spike proteins were based on the genomic sequence of the first isolate, Wuhan-Hu-1 (GenBank: MN908947.3). Sequences were codon-optimized for mammalian cell expression, and the full-length spike sequence was modified to remove the polybasic cleavage site for optimal expression. The plasmid pCAGGS was used for mammalian expression of the SARS Coronavirus 2, Wuhan-Hu-1 spike gene RBD with C-terminal hexa-histidine tag (BEI Resources #NR-52309) and the SARS Coronavirus 2, Wuhan-Hu-1 ectodomain spike gene with C-terminal hexa-histidine tag (BEI Resources #NR-52394).

### 1.2.1. NCI-FNLCR SARS-CoV-2 Spike RBD ELISA Testing

An Immulon 4 HBX 96-well plate (ThermoScientific Cat#3855) was coated with 50  $\mu$ L of SARS-CoV-2 RBD (2  $\mu$ g/mL) and incubated overnight at 4°C. Following incubation, the plate was washed three times (350  $\mu$ L per wash cycle) with an automated plate washer (Biotek, Winooski, VT). The wash buffer consisted of PBS + 0.05% Tween 20 (Millipore Sigma, Cat# P3563). The plate was blocked (200  $\mu$ L per well, 3% skim milk [American Bio, Cat# AB10109-01000], 0.1% Tween 20 [Fisher Bioreagents, Cat# BP337-500] in PBS [Gibco, Cat# 10010-023]) for 60-240 min at room temperature, and then washed three times. Heat-inactivated samples (diluted 1:50 in sample buffer; 1% skim milk with 0.1% Tween-20 in PBS) were then added in singlet (100  $\mu$ L per well) to the plate and incubated at room temperature for 120-240 min. Next, the plate was washed three times, and 50  $\mu$ L of diluted HRP-conjugate (1:3000; Sigma, Cat# A0293) was added to each well and the plate was incubated at room temperature for 50-65 min. The plate was then washed three times, and 100  $\mu$ L of SigmaFast OPD solution (Sigma-Aldrich, Cat# P9187) was added to each well. Following a 10-min room temperature incubation, 50  $\mu$ L of 3M HCl (Fisher Scientific, Cat# S25856) was added to each well and the plate was read at 490 nm on a

Spectramax plate reader (Molecular Devices). Data analyses were performed using SoftMax Pro GxP 7.0.3 and Microsoft Excel. Positive samples were defined as having an optical density (OD) value higher than the negative controls (a set of pre-COVID-19 samples) + 3 standard deviations.

### **1.2.2. NCI-FNLCR SARS-CoV-2 Spike ELISA Screen (Pan-Ig) Testing**

NCI-FNLCR measured anti-spike antibody levels using the assays' standard operating procedures provided by CDC [1]. Initially, samples were screened for anti-SARS-CoV-2 spike antibodies with a pan-Ig conjugate-HRP antibody. Briefly, an Immulon 2 HB 96-well plate (ThermoScientific Cat# 3455) was coated with 100  $\mu$ L of SARS-CoV-2 spike protein (1  $\mu$ g/mL) and incubated overnight (up to 1 week) at 4°C. Following incubation, the plate was washed three times using the procedure described above. The plate was blocked (150  $\mu$ L per well, 5% skim milk [BD, Cat# 232100], 0.1% Tween-20 [Fisher Bioreagents, Cat# BP337-500] in PBS [Gibco, Cat# 10010-023]) for 60 min at 37°C (humidified), then washed three times. Heat-inactivated samples (diluted 1:100 in blocking buffer; 5% skim milk [BD, Cat# 232100], 0.1% Tween-20 [Fisher Bioreagents, Cat# BP337-500] in PBS [Gibco, Cat# 10010-023]) were then added in singlet (100  $\mu$ L per well) to the plate and incubated at 37°C (humidified) for 60 min. Next, the plate was washed three times, and 100  $\mu$ L of diluted goat anti-human IgG/IgA/IgM (pan-Ig) HRP-conjugate (1:4000; KPL, Cat# 074-1007) was added to each well and incubated at 37°C (humidified) for 60 min. The plate was washed three times, and then 100  $\mu$ L of ABTS Peroxidase Substrate (Seracare, Cat# 5120-0035 and 5120-0038) was added to each well. Following a 15-min 37°C (humidified) incubation, 100  $\mu$ L of 1X ABTS Peroxidase Stop Solution (Seracare, Cat# 5150-0017) was added to each well, and the plate was read at 405 nm and 490 nm on a Spectramax plate reader (Molecular Devices). Data analyses were performed as previously described using SoftMax Pro GxP 7.0.3 and Microsoft Excel.

### **1.2.3. NCI-FNLCR SARS-CoV-2 Spike IgG and IgM ELISA Testing**

All positive samples were further evaluated to determine anti-spike IgG and IgM antibody titers. Briefly, rows 1-4 of an Immulon 2 HB 96-well plate (ThermoScientific Cat# 3455) were coated with 100  $\mu$ L of SARS-CoV-2 spike protein (0.15  $\mu$ g/mL) and incubated overnight (up to 1 week) at 4°C. Following incubation, the plate was washed three times as previously described. The plate was blocked (150  $\mu$ L per well, 5% skim milk (BD, Cat# 232100), 0.1% Tween-20 (Fisher Bioreagents, Cat# BP337-500) in PBS (Gibco, Cat# 10010-023) for 60 min at 37°C (humidified), then washed three times. Blocking Buffer (150  $\mu$ L) was added to all rows of the 96-well plate, then 50  $\mu$ L of each heat-inactivated sample (diluted 1:25 in Blocking Buffer; 5% skim milk [BD, Cat# 232100], 0.1% Tween-20 [Fisher Bioreagents, Cat# BP337-500] in PBS [Gibco, Cat# 10010-023] was added to the first and fifth rows of the plate. Next, four-fold serial dilutions ranging from 1:100 to 1:6400 were performed for each sample. The plate was incubated at 37°C (humidified), for 60 min, then washed three times, and 100  $\mu$ L of diluted goat anti-human IgM HRP-conjugate (1:2000; Jackson ImmunoResearch Cat# 109-036-129) or 100  $\mu$ L of diluted goat anti-human IgG HRP-conjugate (1:2000; Seracare, Cat# 5220-0390 for) was added to each well and incubated at 37°C (humidified), for 60 min. The plate was washed three times, and then 100  $\mu$ L of ABTS Peroxidase Substrate (Seracare, Cat# 5120-0035 and 5120-0038) was added to each well. Following a 15-min, 37°C (humidified) incubation, 100  $\mu$ L of 1X ABTS Peroxidase Stop Solution (Seracare, Cat# 5150-0017) was added to each well, and the plate was read at 405 nm and 490 nm on a Spectramax plate reader (Molecular Devices). Data analyses were performed using SoftMax Pro GxP 7.0.3 and Microsoft Excel. To deduct non-specific background reactivity, corrected OD values were calculated by subtracting the ODs of uncoated wells from ODs at corresponding wells coated with SARS-CoV-2 spike protein. Positive samples were defined as having a signal higher than negative control, pre-COVID-19 samples + 3 standard deviations, and the end point titer was reported based on the range from 1:100 to 1:6400 for each sample.

#### **1.2.4. CDC SARS-CoV-2 Spike Testing**

At CDC, all specimens were tested to assess the presence of pan-Ig, IgG and IgM antibodies by ELISA [1] using the pre-fusion stabilized ectodomain of the SARS-CoV-2 spike protein expressed in suspension adapted HEK-293 cells as previously described [2]. ELISA plates were prepared as described previously [1] using 100  $\mu$ L of SARS-CoV-2 spike protein diluted to 0.15  $\mu$ g/mL in PBS or PBS alone (to determine background reactivity). All specimens were initially tested to determine the presence of pan-Ig antibodies. Serum or plasma samples, as well as positive and negative controls, were tested at a final dilution of 1:100 (diluent contained PBS with 0.05% Tween 20 [PBS-T] containing 5% skim milk). Samples and controls were added to both antigen-coated and blank wells as described above. Plates were incubated at 37°C (humidified) for 60 min and washed three times with PBS-Tween 20. HRP (horseradish peroxidase) conjugated goat anti-human IgA + IgG + IgM (pan-Ig) antibodies (Cat# 074 1007, KPL) diluted at 1:2000 in serum diluent were added to washed plates and incubated at 37°C (humidified) for 60 min. Plates were washed three times with PBS-T, 100  $\mu$ L of ABTS peroxidase substrate (Cat# for Solution A is 5120-0035 and Solution B is 5120-0038, KPL) was added to each well, and plates were incubated for 30 min at 37°C. After 30 min, 100  $\mu$ L of ABTS stop solution (Cat# 5150-0017, KPL) was added to each well, and each plate was read at 405 and 490 nm using a PerkinElmer Victor XV plate reader. Final background corrected ODs were calculated as 490-405, by subtracting the ODs of PBS coated well for each specimen. Data analyses were performed using GraphPad Prism software (7.04). Samples that were reactive at a 1:100 dilution using the pan-Ig secondary antibody (background corrected OD >0.4), were then tested using the same plates and protocol except the sera were diluted four-fold (1:100 to 1:6400), and anti-human IgG (Cat# 5220-0330, KPL) and anti-human IgM (Cat# 5220-0457, KPL) were used as secondary antibodies. Samples that were positive at a dilution greater than 1:6400 were assigned a titer of 6400.

Antibody levels are presented as titers for all the FNLCR and CDC data.

## **2. Antibody Assays Evaluated**

In FDA's guidance, Policy for Coronavirus Disease-2019 Tests During the Public Health Emergency, reissued May 11, 2020, FDA outlined recommendations for validation studies to be conducted by test developers for SARS-CoV-2 serology assays and submitted in an EUA request [3]. Final EUA for the serology assays evaluated was determined by FDA based on the totality of scientific evidence available for each test including the data from the studies that were conducted and submitted to FDA by the test developer in addition to the independent evaluation data from this trans-government collaboration. Most companies submitted their assay kits for evaluation in this program under a Material Transfer Agreement. In many cases, FDA requested that serology tests from commercial manufacturers, including lateral flow assays and manual ELISAs, be independently evaluated under this program prior to authorization. In addition, six evaluations were conducted post-market for tests that were already EUA-authorized. Due to limited resources and availability of specimens, assays were prioritized for testing based on several factors, such as the public health need at the time, and to help facilitate timely completion of FDA review. A total of 91 assay evaluations were performed at the NCI-FNLRCR, NIH Clinical Center, and/or CDC, for which the independent evaluation data are publicly available as of January 2021. The tests included 78 lateral flow assays and 10 ELISAs that were evaluated at the NCI-FNLRCR, three automated chemiluminescent immunoassays (CIAs) that were evaluated at the CDC (Architect SARS-CoV-2 IgG, and VITROS Immunodiagnostic Products Anti-SARS-CoV-2 Total Reagent Pack), and one CIA that was evaluated at the NIH Clinical Center (Elecsys Anti-SARS-CoV-2). Details on the devices evaluated, such as manufacturer, kit lot number, target antigen (spike and/or nucleocapsid (N)) are provided in Supplementary Table 1.

### **3. Statistical Analyses**

Commercial serology assays submitted for evaluation by this program were evaluated for two main performance parameters: 1) sensitivity estimates (positive percent agreement [PPA]), representing the percent of positive performance evaluation samples with a positive test result; and

2) specificity estimates (negative percent agreement [NPA]), representing the percent of negative panel samples with a negative test result. These performance estimates may not be indicative of real-world sensitivity or specificity performance of these assays as samples used in the evaluations were not randomly selected. In addition, the PPA of each test was assessed for each claimed antibody type (e.g., IgG, IgM, and/or pan-Ig) in accordance with the assay's intended use and in a combined manner, where a positive result for any antibody type was considered a positive result, as that would be indicative of a sample from an individual with a detectable immune response to the virus. NPA was assessed in a combined manner as well, where a negative result meant a sample was negative for all antibodies a test was intended to detect.

87 individual assays were evaluated under this program. Four of the 87 assays were evaluated twice for a total of 91 evaluations. For the four assays that were evaluated twice, the results of the evaluation were also assessed in a combined manner (n = 95). Combining results from multiple evaluations was appropriate because the study protocol did not change, including the inclusion and exclusion criteria, and because the same assays were used in the evaluations.

Some of the serum and plasma samples, with large volumes available, were used in multiple panels. Serum and plasma samples that were shared between panels have the same Sample ID in the line data for the evaluations. If an assay was evaluated more than once, and a serum or plasma sample was shared between the two panels, then only one result was reported for the combined evaluations. If the results on the sample were discrepant between the evaluations, the result showing the worst-case performance was used. Combining the results of multiple evaluations in this way enabled us to reduce the width of the 95% confidence interval for PPA and NPA for these assays.



## References

1. Freeman B, Lester S, Mills L, et al. Validation of a SARS-CoV-2 spike protein ELISA for use in contact investigations and serosurveillance. bioRxiv 2020 doi: 10.1101/2020.04.24.057323[published Online First: Epub Date]|.
2. Wrapp D, Wang N, Corbett KS, et al. Cryo-EM structure of the 2019-nCoV spike in the prefusion conformation. Science 2020;**367**(6483):1260-63 doi: 10.1126/science.abb2507[published Online First: Epub Date]|.
3. FDA. Policy for Coronavirus Disease-2019 Tests During the Public Health Emergency (Revised). Secondary Policy for Coronavirus Disease-2019 Tests During the Public Health Emergency (Revised) 2020. <https://www.fda.gov/regulatory-information/search-fda-guidance-documents/policy-coronavirus-disease-2019-tests-during-public-health-emergency-revised>.
4. Altman D, Machin D, Bryant T, Gardner M. *Statistics with Confidence: Confidence Intervals and Statistical Guidelines, 2nd Edition*: BMJ Books, 2000.

Fig. S1. Sensitivity and Specificity by Panel.

### A. PPA Performance by Analyte and Panel

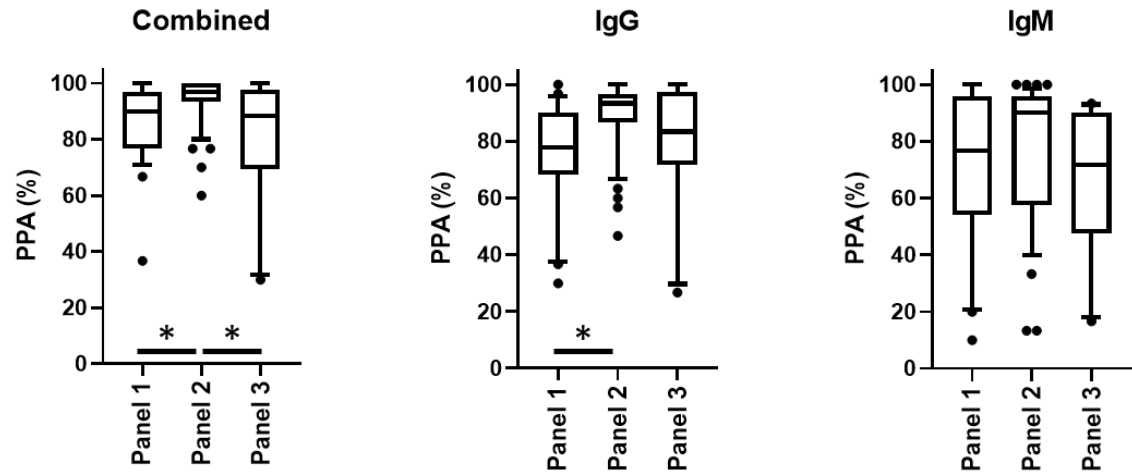

### B. NPA Performance by Analyte and Panel

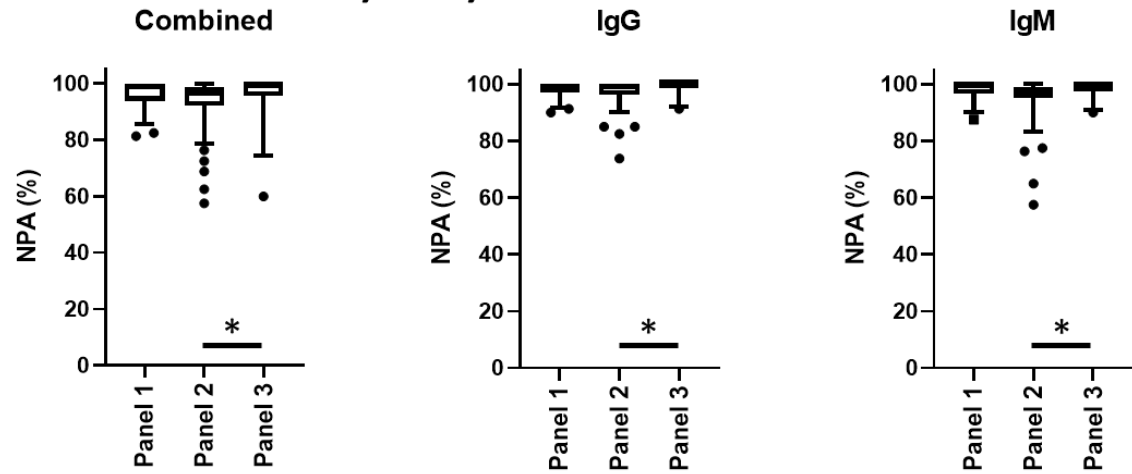

**Fig. S1. Sensitivity and Specificity by Panel.** A) The positive percent agreement (PPA, sensitivity) for each assay is grouped based on panel used for testing for combined, IgG, and IgM detection. B) The negative percent agreement (NPA, specificity) for each assay is grouped based on panel used for testing for combined, IgG, and IgM detection. The bar graphs indicate the median, 25% to 75% range of true call percentages for each titer group value, and the vertical lines represent the 10% to 90% range. Wilcoxon Method was used to evaluate comparisons between each panel and significant ( $p < 0.05$ ) differences between panels are indicated by \*.

Fig. S2. Sensitivity and Specificity by Assay Type.

### A. PPA Performance by Analyte and Assay Type

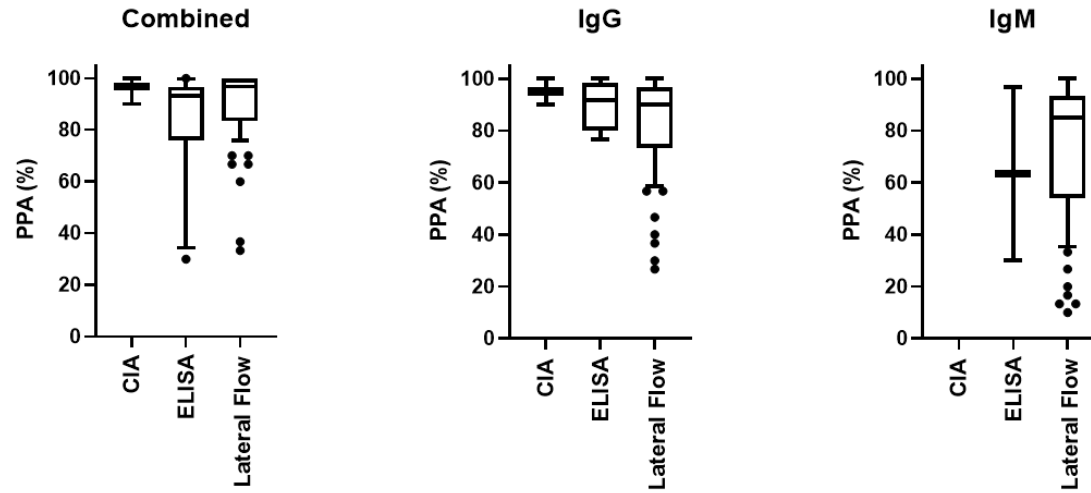

### B. NPA Performance by Analyte and Assay Type

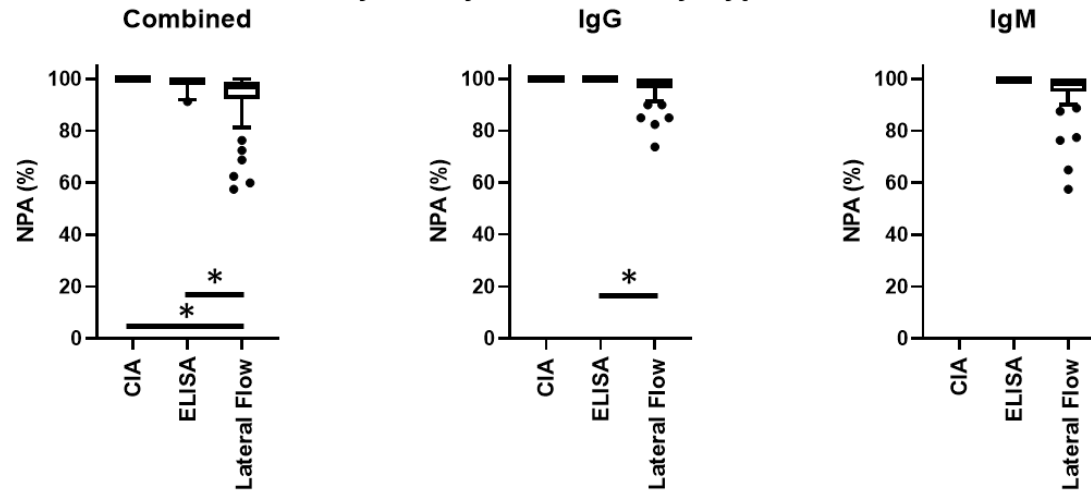

**Fig. S2. Sensitivity and Specificity by Assay Type.** A) The positive percent agreement (PPA, sensitivity) for each assay is grouped based on assay type tested for combined, IgG, and IgM detection. B) The negative percent agreement (NPA, specificity) for each assay is grouped based on assay type tested for combined, IgG, and IgM detection. The bar graphs indicate the median, 25% to 75% range of true call percentages for each titer group value, and the vertical lines represent the 10% to 90% range. Wilcoxon Method was used to evaluate comparisons between each assay type and significant ( $p < 0.05$ ) differences between assay types are indicated by \*.

**Table S1. Serology assay performance data for each evaluation**

| Evaluation ID | Manufacturer                           | Device                                    | Lot Number            | Panel   | Assay Type   | Target       | Regulatory Status | Analyte  | PPA (%) | PPA CI                 | NPA (%) | NPA CI                 | PPV (%) | PPV CI                 | NPV (%) | NPV CI                 |
|---------------|----------------------------------------|-------------------------------------------|-----------------------|---------|--------------|--------------|-------------------|----------|---------|------------------------|---------|------------------------|---------|------------------------|---------|------------------------|
| maf3305-a001  | Abbott                                 | Architect i1000 SARS-CoV-2 IgG            | 15016M800             | Panel 1 | CIA          | Nucleocapsid | EUA Authorized    | Combined | 90.0    | (95% CI: 74.4%; 96.5%) | 100.0   | (95% CI: 95.4%; 100%)  | 100.0   | (95% CI: 46.1%; 100%)  | 99.5    | (95% CI: 98.6%; 99.8%) |
| maf3305-a001  | Abbott                                 | Architect i1000 SARS-CoV-2 IgG            | 15016M800             | Panel 1 | CIA          | Nucleocapsid | EUA Authorized    | IgG      | 90.0    | (95% CI: 74.4%; 96.5%) | 100.0   | (95% CI: 95.4%; 100%)  | 100.0   | (95% CI: 46.1%; 100%)  | 99.5    | (95% CI: 98.6%; 99.8%) |
| maf3246-a001  | Euroimmun                              | SARS-COV-2 ELISA (IgG)                    | E200330DT             | Panel 1 | ELISA        | Spike        | EUA Authorized    | Combined | 90.0    | (95% CI: 74.4%; 96.5%) | 100.0   | (95% CI: 95.4%; 100%)  | 100.0   | (95% CI: 46.1%; 100%)  | 99.5    | (95% CI: 98.6%; 99.8%) |
| maf3246-a001  | Euroimmun                              | SARS-COV-2 ELISA (IgG)                    | E200330DT             | Panel 1 | ELISA        | Spike        | EUA Authorized    | IgG      | 90.0    | (95% CI: 74.4%; 96.5%) | 100.0   | (95% CI: 95.4%; 100%)  | 100.0   | (95% CI: 46.1%; 100%)  | 99.5    | (95% CI: 98.6%; 99.8%) |
| maf3268-a001  | Euroimmun                              | SARS-COV-2 ELISA (IgA)                    | E200330AS             | Panel 1 | ELISA        | Unknown      | Not Authorized    | Combined | 93.3    | (95% CI: 78.7%; 98.2%) | 91.3    | (95% CI: 83.0%; 95.7%) | 36.0    | (95% CI: 19.6%; 54.6%) | 99.6    | (95% CI: 98.7%; 99.9%) |
| maf3268-a001  | Euroimmun                              | SARS-COV-2 ELISA (IgA)                    | E200330AS             | Panel 1 | ELISA        | Unknown      | Not Authorized    | IgA      | 93.3    | (95% CI: 78.7%; 98.2%) | 91.3    | (95% CI: 83.0%; 95.7%) | 36.0    | (95% CI: 19.6%; 54.6%) | 99.6    | (95% CI: 98.7%; 99.9%) |
| maf3247-a001  | Healgen                                | COVID-19 IgG/IgM Rapid Test Cassette      | 2003292               | Panel 1 | Lateral Flow | Spike        | EUA Authorized    | Combined | 100.0   | (95% CI: 88.6%; 100%)  | 97.5    | (95% CI: 91.3%; 99.3%) | 67.8    | (95% CI: 35.0%; 88.4%) | 100.0   | (95% CI: 99.4%; 100%)  |
| maf3247-a001  | Healgen                                | COVID-19 IgG/IgM Rapid Test Cassette      | 2003292               | Panel 1 | Lateral Flow | Spike        | EUA Authorized    | IgG      | 96.7    | (95% CI: 83.3%; 99.4%) | 97.5    | (95% CI: 91.3%; 99.3%) | 67.1    | (95% CI: 33.6%; 88.4%) | 99.8    | (95% CI: 99.0%; 100%)  |
| maf3247-a001  | Healgen                                | COVID-19 IgG/IgM Rapid Test Cassette      | 2003292               | Panel 1 | Lateral Flow | Spike        | EUA Authorized    | IgM      | 100.0   | (95% CI: 88.6%; 100%)  | 100.0   | (95% CI: 95.4%; 100%)  | 100.0   | (95% CI: 50.5%; 100%)  | 100.0   | (95% CI: 99.4%; 100%)  |
| maf3248-a001  | Biomedomics                            | COVID-19 IgM-IgG Rapid Test kit           | 51-200404             | Panel 1 | Lateral Flow | Unknown      | Not Authorized    | Combined | 96.7    | (95% CI: 83.3%; 99.4%) | 97.1    | (95% CI: 90.2%; 99.2%) | 64.0    | (95% CI: 30.8%; 86.8%) | 99.8    | (95% CI: 99.0%; 100%)  |
| maf3248-a001  | Biomedomics                            | COVID-19 IgM-IgG Rapid Test kit           | 51-200404             | Panel 1 | Lateral Flow | Unknown      | Not Authorized    | IgG      | 73.3    | (95% CI: 55.6%; 85.8%) | 100.0   | (95% CI: 95.4%; 100%)  | 100.0   | (95% CI: 39.0%; 100%)  | 98.6    | (95% CI: 97.6%; 99.3%) |
| maf3248-a001  | Biomedomics                            | COVID-19 IgM-IgG Rapid Test kit           | 51-200404             | Panel 1 | Lateral Flow | Unknown      | Not Authorized    | IgM      | 86.7    | (95% CI: 70.3%; 94.7%) | 97.1    | (95% CI: 90.2%; 99.2%) | 61.5    | (95% CI: 27.3%; 86.4%) | 99.3    | (95% CI: 98.3%; 99.7%) |
| maf3249-a001  | Phamatech                              | COVID19 RAPID TEST                        | NCP 20030239          | Panel 1 | Lateral Flow | Unknown      | Not Authorized    | Combined | 86.7    | (95% CI: 70.3%; 94.7%) | 93.8    | (95% CI: 86.2%; 97.3%) | 42.2    | (95% CI: 21.1%; 64.9%) | 99.3    | (95% CI: 98.2%; 99.7%) |
| maf3249-a001  | Phamatech                              | COVID19 RAPID TEST                        | NCP 20030239          | Panel 1 | Lateral Flow | Unknown      | Not Authorized    | IgG      | 86.7    | (95% CI: 70.3%; 94.7%) | 96.3    | (95% CI: 89.5%; 98.7%) | 54.9    | (95% CI: 26.1%; 79.5%) | 99.3    | (95% CI: 98.3%; 99.7%) |
| maf3249-a001  | Phamatech                              | COVID19 RAPID TEST                        | NCP 20030239          | Panel 1 | Lateral Flow | Unknown      | Not Authorized    | IgM      | 26.7    | (95% CI: 14.2%; 44.4%) | 97.5    | (95% CI: 91.3%; 99.3%) | 36.0    | (95% CI: 7.9%; 77.3%)  | 96.2    | (95% CI: 95.3%; 97.1%) |
| maf3251-a001  | Tianjin Beroni Biotechnology Co., Ltd. | SARS-COV-2 IgG/IgM Antibody Detection Kit | 20200405 (Test Strip) | Panel 1 | Lateral Flow | S1           | Not Authorized    | Combined | 90.0    | (95% CI: 74.4%; 96.5%) | 100.0   | (95% CI: 94.8%; 100%)  | 100.0   | (95% CI: 42.9%; 100%)  | 99.5    | (95% CI: 98.6%; 99.8%) |
| maf3251-a001  | Tianjin Beroni Biotechnology Co., Ltd. | SARS-COV-2 IgG/IgM Antibody Detection Kit | 20200405 (Test Strip) | Panel 1 | Lateral Flow | S1           | Not Authorized    | IgG      | 30.0    | (95% CI: 16.7%; 47.9%) | 100.0   | (95% CI: 95.4%; 100%)  | 100.0   | (95% CI: 16.1%; 100%)  | 96.4    | (95% CI: 95.6%; 97.3%) |
| maf3251-a001  | Tianjin Beroni Biotechnology Co., Ltd. | SARS-COV-2 IgG/IgM Antibody Detection Kit | 20200405 (Test Strip) | Panel 1 | Lateral Flow | S1           | Not Authorized    | IgM      | 83.3    | (95% CI: 66.4%; 92.7%) | 100.0   | (95% CI: 94.8%; 100%)  | 100.0   | (95% CI: 40.2%; 100%)  | 99.1    | (95% CI: 98.2%; 99.6%) |
| maf3265-a001  | ChemBio                                | DPP COVID-19 IgM/IgG System               | 204IG001Z             | Panel 1 | Lateral Flow | Unknown      | Not Authorized    | Combined | 82.1    | (95% CI: 64.4%; 92.1%) | 81.3    | (95% CI: 71.3%; 88.3%) | 18.7    | (95% CI: 10.6%; 29.3%) | 98.9    | (95% CI: 97.4%; 99.5%) |
| maf3265-a001  | ChemBio                                | DPP COVID-19 IgM/IgG System               | 204IG001Z             | Panel 1 | Lateral Flow | Unknown      | Not Authorized    | IgG      | 78.6    | (95% CI: 60.5%; 89.8%) | 91.3    | (95% CI: 83.0%; 95.7%) | 32.1    | (95% CI: 15.8%; 52.3%) | 98.8    | (95% CI: 97.6%; 99.4%) |
| maf3265-a001  | ChemBio                                | DPP COVID-19 IgM/IgG System               | 204IG001Z             | Panel 1 | Lateral Flow | Unknown      | Not Authorized    | IgM      | 57.1    | (95% CI: 39.1%; 73.5%) | 90.0    | (95% CI: 80.8%; 95.1%) | 23.1    | (95% CI: 9.7%; 44.0%)  | 97.6    | (95% CI: 96.2%; 98.6%) |
| maf3277-a001  | TESTSEALABS                            | SARS-COV-2-IgG/IgM Test Cassette          | 20200320              | Panel 1 | Lateral Flow | Unknown      | Not Authorized    | Combined | 83.3    | (95% CI: 66.4%; 92.7%) | 92.5    | (95% CI: 84.6%; 96.5%) | 36.9    | (95% CI: 18.5%; 58.3%) | 99.1    | (95% CI: 98.0%; 99.6%) |
| maf3277-a001  | TESTSEALABS                            | SARS-COV-2-IgG/IgM Test Cassette          | 20200320              | Panel 1 | Lateral Flow | Unknown      | Not Authorized    | IgG      | 40.0    | (95% CI: 24.6%; 57.7%) | 93.8    | (95% CI: 86.2%; 97.3%) | 25.2    | (95% CI: 8.6%; 52.9%)  | 96.7    | (95% CI: 95.6%; 97.8%) |
| maf3277-a001  | TESTSEALABS                            | SARS-COV-2-IgG/IgM Test Cassette          | 20200320              | Panel 1 | Lateral Flow | Unknown      | Not Authorized    | IgM      | 73.3    | (95% CI: 55.6%; 85.8%) | 100.0   | (95% CI: 94.8%; 100%)  | 100.0   | (95% CI: 36.0%; 100%)  | 98.6    | (95% CI: 97.6%; 99.3%) |
| maf3252-a001  | Hangzhou Biotest Biotech, Co., Ltd.    | Covid-19 IgG/IgM Rapid Test Cassette      | COV 20030071          | Panel 1 | Lateral Flow | Spike        | EUA Authorized    | Combined | 100.0   | (95% CI: 88.6%; 100%)  | 100.0   | (95% CI: 95.4%; 100%)  | 100.0   | (95% CI: 50.5%; 100%)  | 100.0   | (95% CI: 99.4%; 100%)  |
| maf3252-a001  | Hangzhou Biotest Biotech, Co., Ltd.    | Covid-19 IgG/IgM Rapid Test Cassette      | COV 20030071          | Panel 1 | Lateral Flow | Spike        | EUA Authorized    | IgG      | 93.3    | (95% CI: 78.7%; 98.2%) | 100.0   | (95% CI: 95.4%; 100%)  | 100.0   | (95% CI: 47.5%; 100%)  | 99.7    | (95% CI: 98.8%; 99.9%) |

| Evaluation ID | Manufacturer                        | Device                                                                  | Lot Number     | Panel   | Assay Type   | Target  | Regulatory Status | Analyte  | PPA (%) | PPA CI                 | NPA (%) | NPA CI                 | PPV (%) | PPV CI                 | NPV (%) | NPV CI                 |
|---------------|-------------------------------------|-------------------------------------------------------------------------|----------------|---------|--------------|---------|-------------------|----------|---------|------------------------|---------|------------------------|---------|------------------------|---------|------------------------|
| maf3252-a001  | Hangzhou Biotest Biotech, Co., Ltd. | Covid-19 IgG/IgM Rapid Test Cassette                                    | COV 20030071   | Panel 1 | Lateral Flow | Spike   | EUA Authorized    | IgM      | 100.0   | (95% CI: 88.6%; 100%)  | 100.0   | (95% CI: 95.4%; 100%)  | 100.0   | (95% CI: 50.5%; 100%)  | 100.0   | (95% CI: 99.4%; 100%)  |
| maf3254-a001  | Accudiagnosics                      | Covid-19 IgM/IgG Test Kit                                               | NA             | Panel 1 | Lateral Flow | Unknown | Not Authorized    | Combined | 100.0   | (95% CI: 88.6%; 100%)  | 82.5    | (95% CI: 72.7%; 89.3%) | 23.1    | (95% CI: 14.6%; 32.9%) | 100.0   | (95% CI: 99.2%; 100%)  |
| maf3254-a001  | Accudiagnosics                      | Covid-19 IgM/IgG Test Kit                                               | NA             | Panel 1 | Lateral Flow | Unknown | Not Authorized    | IgG      | 100.0   | (95% CI: 88.6%; 100%)  | 92.5    | (95% CI: 84.6%; 96.5%) | 41.2    | (95% CI: 23.2%; 60.2%) | 100.0   | (95% CI: 99.3%; 100%)  |
| maf3254-a001  | Accudiagnosics                      | Covid-19 IgM/IgG Test Kit                                               | NA             | Panel 1 | Lateral Flow | Unknown | Not Authorized    | IgM      | 100.0   | (95% CI: 88.6%; 100%)  | 87.5    | (95% CI: 78.5%; 93.1%) | 29.6    | (95% CI: 17.8%; 43.2%) | 100.0   | (95% CI: 99.2%; 100%)  |
| maf3267-a001  | W.H.P.M, Inc.                       | Covisure Covid-19 IgM/IgG Rapid Test                                    | P0406203922    | Panel 1 | Lateral Flow | Unknown | Not Authorized    | Combined | 76.7    | (95% CI: 59.1%; 88.2%) | 97.1    | (95% CI: 90.2%; 99.2%) | 58.5    | (95% CI: 24.0%; 85.5%) | 98.8    | (95% CI: 97.7%; 99.4%) |
| maf3267-a001  | W.H.P.M, Inc.                       | Covisure Covid-19 IgM/IgG Rapid Test                                    | P0406203922    | Panel 1 | Lateral Flow | Unknown | Not Authorized    | IgG      | 70.0    | (95% CI: 52.1%; 83.3%) | 97.1    | (95% CI: 90.2%; 99.2%) | 56.3    | (95% CI: 21.8%; 84.8%) | 98.4    | (95% CI: 97.3%; 99.1%) |
| maf3267-a001  | W.H.P.M, Inc.                       | Covisure Covid-19 IgM/IgG Rapid Test                                    | P0406203922    | Panel 1 | Lateral Flow | Unknown | Not Authorized    | IgM      | 76.7    | (95% CI: 59.1%; 88.2%) | 97.1    | (95% CI: 90.2%; 99.2%) | 58.5    | (95% CI: 24.0%; 85.5%) | 98.8    | (95% CI: 97.7%; 99.4%) |
| maf3272-a001  | Atlas-Link (Beijing)                | Nova COVID-19 IgG/IgM Antibody Rapid Test                               | 20200305       | Panel 1 | Lateral Flow | Unknown | Not Authorized    | Combined | 90.0    | (95% CI: 74.4%; 96.5%) | 90.0    | (95% CI: 81.5%; 94.8%) | 32.1    | (95% CI: 17.5%; 49.6%) | 99.4    | (95% CI: 98.4%; 99.8%) |
| maf3272-a001  | Atlas-Link (Beijing)                | Nova COVID-19 IgG/IgM Antibody Rapid Test                               | 20200305       | Panel 1 | Lateral Flow | Unknown | Not Authorized    | IgG      | 90.0    | (95% CI: 74.4%; 96.5%) | 90.0    | (95% CI: 81.5%; 94.8%) | 32.1    | (95% CI: 17.5%; 49.6%) | 99.4    | (95% CI: 98.4%; 99.8%) |
| maf3272-a001  | Atlas-Link (Beijing)                | Nova COVID-19 IgG/IgM Antibody Rapid Test                               | 20200305       | Panel 1 | Lateral Flow | Unknown | Not Authorized    | IgM      | 90.0    | (95% CI: 74.4%; 96.5%) | 90.0    | (95% CI: 81.5%; 94.8%) | 32.1    | (95% CI: 17.5%; 49.6%) | 99.4    | (95% CI: 98.4%; 99.8%) |
| maf3255-a001  | Alfa Scientific Designs Inc.        | Covid-19 IgG/IgM Antibody Test                                          | PD200420A      | Panel 1 | Lateral Flow | Unknown | Not Authorized    | Combined | 100.0   | (95% CI: 88.6%; 100%)  | 93.8    | (95% CI: 86.2%; 97.3%) | 45.7    | (95% CI: 25.3%; 66.1%) | 100.0   | (95% CI: 99.3%; 100%)  |
| maf3255-a001  | Alfa Scientific Designs Inc.        | Covid-19 IgG/IgM Antibody Test                                          | PD200420A      | Panel 1 | Lateral Flow | Unknown | Not Authorized    | IgG      | 80.0    | (95% CI: 62.7%; 90.5%) | 100.0   | (95% CI: 95.4%; 100%)  | 100.0   | (95% CI: 41.9%; 100%)  | 99.0    | (95% CI: 98.0%; 99.5%) |
| maf3255-a001  | Alfa Scientific Designs Inc.        | Covid-19 IgG/IgM Antibody Test                                          | PD200420A      | Panel 1 | Lateral Flow | Unknown | Not Authorized    | IgM      | 100.0   | (95% CI: 88.6%; 100%)  | 93.8    | (95% CI: 86.2%; 97.3%) | 45.7    | (95% CI: 25.3%; 66.1%) | 100.0   | (95% CI: 99.3%; 100%)  |
| maf3259-a001  | Invenio Medical Inc.                | COVID-19 IgG/IgM Ab Rapid Test                                          | COVID 20200424 | Panel 1 | Lateral Flow | Unknown | Not Authorized    | Combined | 80.0    | (95% CI: 62.7%; 90.5%) | 100.0   | (95% CI: 95.4%; 100%)  | 100.0   | (95% CI: 41.9%; 100%)  | 99.0    | (95% CI: 98.0%; 99.5%) |
| maf3259-a001  | Invenio Medical Inc.                | COVID-19 IgG/IgM Ab Rapid Test                                          | COVID 20200424 | Panel 1 | Lateral Flow | Unknown | Not Authorized    | IgG      | 80.0    | (95% CI: 62.7%; 90.5%) | 100.0   | (95% CI: 95.4%; 100%)  | 100.0   | (95% CI: 41.9%; 100%)  | 99.0    | (95% CI: 98.0%; 99.5%) |
| maf3259-a001  | Invenio Medical Inc.                | COVID-19 IgG/IgM Ab Rapid Test                                          | COVID 20200424 | Panel 1 | Lateral Flow | Unknown | Not Authorized    | IgM      | 76.7    | (95% CI: 59.1%; 88.2%) | 100.0   | (95% CI: 95.4%; 100%)  | 100.0   | (95% CI: 40.4%; 100%)  | 98.8    | (95% CI: 97.8%; 99.4%) |
| maf3280-a001  | Zhuhai Livzon Diagnostic Inc.       | IgM/IgG Diagnostic Kit for IgM/IgG Antibody to Coronavirus (SARS-COV-2) | CK 2004240410  | Panel 1 | Lateral Flow | Unknown | Not Authorized    | Combined | 93.3    | (95% CI: 78.7%; 98.2%) | 100.0   | (95% CI: 95.4%; 100%)  | 100.0   | (95% CI: 47.5%; 100%)  | 99.7    | (95% CI: 98.8%; 99.9%) |
| maf3280-a001  | Zhuhai Livzon Diagnostic Inc.       | IgM/IgG Diagnostic Kit for IgM/IgG Antibody to Coronavirus (SARS-COV-2) | CK 2004240410  | Panel 1 | Lateral Flow | Unknown | Not Authorized    | IgG      | 63.3    | (95% CI: 45.5%; 78.1%) | 100.0   | (95% CI: 95.4%; 100%)  | 100.0   | (95% CI: 34.3%; 100%)  | 98.1    | (95% CI: 97.1%; 98.9%) |
| maf3280-a001  | Zhuhai Livzon Diagnostic Inc.       | IgM/IgG Diagnostic Kit for IgM/IgG Antibody to Coronavirus (SARS-COV-2) | CK 2004240410  | Panel 1 | Lateral Flow | Unknown | Not Authorized    | IgM      | 93.3    | (95% CI: 78.7%; 98.2%) | 100.0   | (95% CI: 95.4%; 100%)  | 100.0   | (95% CI: 47.5%; 100%)  | 99.7    | (95% CI: 98.8%; 99.9%) |
| maf3257-a001  | Abacus Pharma International         | SARS-CoV-2 IgM/IgG AB Antibody Rapid Test (Immunochromatography)        | COV 1252003C   | Panel 1 | Lateral Flow | Unknown | Not Authorized    | Combined | 76.7    | (95% CI: 59.1%; 88.2%) | 98.8    | (95% CI: 93.3%; 99.8%) | 76.3    | (95% CI: 31.5%; 95.5%) | 98.8    | (95% CI: 97.7%; 99.4%) |
| maf3257-a001  | Abacus Pharma International         | SARS-CoV-2 IgM/IgG AB Antibody Rapid Test (Immunochromatography)        | COV 1252003C   | Panel 1 | Lateral Flow | Unknown | Not Authorized    | IgG      | 73.3    | (95% CI: 55.6%; 85.8%) | 98.8    | (95% CI: 93.3%; 99.8%) | 75.5    | (95% CI: 30.2%; 95.3%) | 98.6    | (95% CI: 97.6%; 99.3%) |
| maf3257-a001  | Abacus Pharma International         | SARS-CoV-2 IgM/IgG AB Antibody Rapid Test (Immunochromatography)        | COV 1252003C   | Panel 1 | Lateral Flow | Unknown | Not Authorized    | IgM      | 53.3    | (95% CI: 36.1%; 69.8%) | 100.0   | (95% CI: 95.4%; 100%)  | 100.0   | (95% CI: 29.3%; 100%)  | 97.6    | (95% CI: 96.6%; 98.4%) |
| maf3258-a001  | Aurora Biomed Inc                   | COVID-19 IgG/IgM Rapid Test                                             | COVID 20200424 | Panel 1 | Lateral Flow | Unknown | Not Authorized    | Combined | 76.7    | (95% CI: 59.1%; 88.2%) | 100.0   | (95% CI: 95.4%; 100%)  | 100.0   | (95% CI: 40.4%; 100%)  | 98.8    | (95% CI: 97.8%; 99.4%) |
| maf3258-a001  | Aurora Biomed Inc                   | COVID-19 IgG/IgM Rapid Test                                             | COVID 20200424 | Panel 1 | Lateral Flow | Unknown | Not Authorized    | IgG      | 76.7    | (95% CI: 59.1%; 88.2%) | 100.0   | (95% CI: 95.4%; 100%)  | 100.0   | (95% CI: 40.4%; 100%)  | 98.8    | (95% CI: 97.8%; 99.4%) |
| maf3258-a001  | Aurora Biomed Inc                   | COVID-19 IgG/IgM Rapid Test                                             | COVID 20200424 | Panel 1 | Lateral Flow | Unknown | Not Authorized    | IgM      | 66.7    | (95% CI: 48.8%; 80.8%) | 100.0   | (95% CI: 95.4%; 100%)  | 100.0   | (95% CI: 35.9%; 100%)  | 98.3    | (95% CI: 97.3%; 99.0%) |

| Evaluation ID | Manufacturer                                        | Device                                                                            | Lot Number            | Panel   | Assay Type   | Target       | Regulatory Status | Analyte  | PPA (%) | PPA CI                 | NPA (%) | NPA CI                 | PPV (%) | PPV CI                 | NPV (%) | NPV CI                 |
|---------------|-----------------------------------------------------|-----------------------------------------------------------------------------------|-----------------------|---------|--------------|--------------|-------------------|----------|---------|------------------------|---------|------------------------|---------|------------------------|---------|------------------------|
| maf3263-a001  | BTNX, Inc.                                          | COVID-19 IgG/IgM Test Cassettes (Whole Blood/Serum/Plasma)                        | I2004027              | Panel 1 | Lateral Flow | Unknown      | Not Authorized    | Combined | 100.0   | (95% CI: 88.6%; 100%)  | 100.0   | (95% CI: 94.8%; 100%)  | 100.0   | (95% CI: 47.3%; 100%)  | 100.0   | (95% CI: 99.4%; 100%)  |
| maf3263-a001  | BTNX, Inc.                                          | COVID-19 IgG/IgM Test Cassettes (Whole Blood/Serum/Plasma)                        | I2004027              | Panel 1 | Lateral Flow | Unknown      | Not Authorized    | IgG      | 86.7    | (95% CI: 70.3%; 94.7%) | 100.0   | (95% CI: 95.4%; 100%)  | 100.0   | (95% CI: 44.7%; 100%)  | 99.3    | (95% CI: 98.4%; 99.7%) |
| maf3263-a001  | BTNX, Inc.                                          | COVID-19 IgG/IgM Test Cassettes (Whole Blood/Serum/Plasma)                        | I2004027              | Panel 1 | Lateral Flow | Unknown      | Not Authorized    | IgM      | 96.7    | (95% CI: 83.3%; 99.4%) | 100.0   | (95% CI: 94.8%; 100%)  | 100.0   | (95% CI: 45.7%; 100%)  | 99.8    | (95% CI: 99.1%; 100%)  |
| maf3266-a001  | Chemtron Biotech, Inc.                              | Rapid COVID-19 IgM/IgG Antibody Screen Test                                       | DA05507401            | Panel 1 | Lateral Flow | Unknown      | Not Authorized    | Combined | 66.7    | (95% CI: 48.8%; 80.8%) | 98.8    | (95% CI: 93.3%; 99.8%) | 73.7    | (95% CI: 27.6%; 95.1%) | 98.3    | (95% CI: 97.2%; 99.0%) |
| maf3266-a001  | Chemtron Biotech, Inc.                              | Rapid COVID-19 IgM/IgG Antibody Screen Test                                       | DA05507401            | Panel 1 | Lateral Flow | Unknown      | Not Authorized    | IgG      | 63.3    | (95% CI: 45.5%; 78.1%) | 98.8    | (95% CI: 93.3%; 99.8%) | 72.7    | (95% CI: 26.2%; 94.9%) | 98.1    | (95% CI: 97.0%; 98.9%) |
| maf3266-a001  | Chemtron Biotech, Inc.                              | Rapid COVID-19 IgM/IgG Antibody Screen Test                                       | DA05507401            | Panel 1 | Lateral Flow | Unknown      | Not Authorized    | IgM      | 20.0    | (95% CI: 9.5%; 37.3%)  | 100.0   | (95% CI: 95.4%; 100%)  | 100.0   | (95% CI: 9.8%; 100%)   | 96.0    | (95% CI: 95.2%; 96.8%) |
| maf3269-a001  | Shanghai Fosun Long March Medical Science Co., Ltd. | Fosun COVID-19 IgG/IgM Rapid Antibody Detection Kit                               | 20200302              | Panel 1 | Lateral Flow | Unknown      | Not Authorized    | Combined | 36.7    | (95% CI: 21.9%; 54.5%) | 95.0    | (95% CI: 87.8%; 98.0%) | 27.8    | (95% CI: 8.6%; 59.4%)  | 96.6    | (95% CI: 95.5%; 97.6%) |
| maf3269-a001  | Shanghai Fosun Long March Medical Science Co., Ltd. | Fosun COVID-19 IgG/IgM Rapid Antibody Detection Kit                               | 20200302              | Panel 1 | Lateral Flow | Unknown      | Not Authorized    | IgG      | 36.7    | (95% CI: 21.9%; 54.5%) | 98.8    | (95% CI: 93.3%; 99.8%) | 60.7    | (95% CI: 14.6%; 92.8%) | 96.7    | (95% CI: 95.8%; 97.7%) |
| maf3269-a001  | Shanghai Fosun Long March Medical Science Co., Ltd. | Fosun COVID-19 IgG/IgM Rapid Antibody Detection Kit                               | 20200302              | Panel 1 | Lateral Flow | Unknown      | Not Authorized    | IgM      | 10.0    | (95% CI: 3.5%; 25.6%)  | 96.3    | (95% CI: 89.5%; 98.7%) | 12.3    | (95% CI: 1.7%; 51.2%)  | 95.3    | (95% CI: 94.6%; 96.2%) |
| maf3270-a001  | GP Getein Biotech, Inc.                             | One Step Test for Novel Coronavirus (2019-nCoV) IgM/IgG antibody (Colloidal Gold) | PGGM 20015W           | Panel 1 | Lateral Flow | Unknown      | Not Authorized    | Combined | 76.7    | (95% CI: 59.1%; 88.2%) | 98.8    | (95% CI: 93.3%; 99.8%) | 76.3    | (95% CI: 31.5%; 95.5%) | 98.8    | (95% CI: 97.7%; 99.4%) |
| maf3270-a001  | GP Getein Biotech, Inc.                             | One Step Test for Novel Coronavirus (2019-nCoV) IgM/IgG antibody (Colloidal Gold) | PGGM 20015W           | Panel 1 | Lateral Flow | Unknown      | Not Authorized    | IgG      | 73.3    | (95% CI: 55.6%; 85.8%) | 100.0   | (95% CI: 95.4%; 100%)  | 100.0   | (95% CI: 39.0%; 100%)  | 98.6    | (95% CI: 97.6%; 99.3%) |
| maf3270-a001  | GP Getein Biotech, Inc.                             | One Step Test for Novel Coronavirus (2019-nCoV) IgM/IgG antibody (Colloidal Gold) | PGGM 20015W           | Panel 1 | Lateral Flow | Unknown      | Not Authorized    | IgM      | 56.7    | (95% CI: 39.2%; 72.6%) | 98.8    | (95% CI: 93.3%; 99.8%) | 70.5    | (95% CI: 23.4%; 94.5%) | 97.7    | (95% CI: 96.7%; 98.6%) |
| maf3274-a001  | SD BIOSENSOR, Inc.                                  | STANDARD Q COVID-19 IgM/IgG Duo                                                   | QC01020007/ sub : A-2 | Panel 1 | Lateral Flow | Unknown      | Not Authorized    | Combined | 76.7    | (95% CI: 59.1%; 88.2%) | 98.8    | (95% CI: 93.3%; 99.8%) | 76.3    | (95% CI: 31.5%; 95.5%) | 98.8    | (95% CI: 97.7%; 99.4%) |
| maf3274-a001  | SD BIOSENSOR, Inc.                                  | STANDARD Q COVID-19 IgM/IgG Duo                                                   | QC01020007/ sub : A-2 | Panel 1 | Lateral Flow | Unknown      | Not Authorized    | IgG      | 73.3    | (95% CI: 55.6%; 85.8%) | 98.8    | (95% CI: 93.3%; 99.8%) | 75.5    | (95% CI: 30.2%; 95.3%) | 98.6    | (95% CI: 97.6%; 99.3%) |
| maf3274-a001  | SD BIOSENSOR, Inc.                                  | STANDARD Q COVID-19 IgM/IgG Duo                                                   | QC01020007/ sub : A-2 | Panel 1 | Lateral Flow | Unknown      | Not Authorized    | IgM      | 53.3    | (95% CI: 36.1%; 69.8%) | 100.0   | (95% CI: 95.4%; 100%)  | 100.0   | (95% CI: 29.3%; 100%)  | 97.6    | (95% CI: 96.6%; 98.4%) |
| maf3358-a001  | Roche Diagnostic Corporation                        | Elecsys Anti-SARS-CoV-2                                                           | 50726001              | Panel 2 | CIA          | Nucleocapsid | EUA Authorized    | Combined | 96.7    | (95% CI: 83.3%; 99.4%) | 100.0   | (95% CI: 95.4%; 100%)  | 100.0   | (95% CI: 48.9%; 100%)  | 99.8    | (95% CI: 99.1%; 100%)  |
| maf3358-a001  | Roche Diagnostic Corporation                        | Elecsys Anti-SARS-CoV-2                                                           | 50726001              | Panel 2 | CIA          | Nucleocapsid | EUA Authorized    | Pan Ig   | 96.7    | (95% CI: 83.3%; 99.4%) | 100.0   | (95% CI: 95.4%; 100%)  | 100.0   | (95% CI: 48.9%; 100%)  | 99.8    | (95% CI: 99.1%; 100%)  |
| maf3315-a001  | InBios International Inc.                           | SCoV-2 Detect™ IgG ELISA                                                          | DFT1172               | Panel 2 | ELISA        | Spike        | EUA Authorized    | Combined | 100.0   | (95% CI: 88.6%; 100%)  | 100.0   | (95% CI: 95.4%; 100%)  | 100.0   | (95% CI: 50.5%; 100%)  | 100.0   | (95% CI: 99.4%; 100%)  |
| maf3315-a001  | InBios International Inc.                           | SCoV-2 Detect™ IgG ELISA                                                          | DFT1172               | Panel 2 | ELISA        | Spike        | EUA Authorized    | IgG      | 100.0   | (95% CI: 88.6%; 100%)  | 100.0   | (95% CI: 95.4%; 100%)  | 100.0   | (95% CI: 50.5%; 100%)  | 100.0   | (95% CI: 99.4%; 100%)  |
| maf3316-a001  | InBios International Inc.                           | SCoV-2 Detect™ IgM ELISA                                                          | DFT1170               | Panel 2 | ELISA        | Spike        | EUA Authorized    | Combined | 96.7    | (95% CI: 83.3%; 99.4%) | 98.8    | (95% CI: 93.3%; 99.8%) | 80.3    | (95% CI: 39.4%; 95.9%) | 99.8    | (95% CI: 99.1%; 100%)  |
| maf3316-a001  | InBios International Inc.                           | SCoV-2 Detect™ IgM ELISA                                                          | DFT1170               | Panel 2 | ELISA        | Spike        | EUA Authorized    | IgM      | 96.7    | (95% CI: 83.3%; 99.4%) | 98.8    | (95% CI: 93.3%; 99.8%) | 80.3    | (95% CI: 39.4%; 95.9%) | 99.8    | (95% CI: 99.1%; 100%)  |
| maf3312-a001  | Arbor Vita Corporation                              | CoVisa™ IgG Test                                                                  | RD20060803            | Panel 2 | ELISA        | Unknown      | Not Authorized    | Combined | 76.7    | (95% CI: 59.1%; 88.2%) | 100.0   | (95% CI: 95.4%; 100%)  | 100.0   | (95% CI: 40.4%; 100%)  | 98.8    | (95% CI: 97.8%; 99.4%) |
| maf3312-a001  | Arbor Vita Corporation                              | CoVisa™ IgG Test                                                                  | RD20060803            | Panel 2 | ELISA        | Unknown      | Not Authorized    | IgG      | 76.7    | (95% CI: 59.1%; 88.2%) | 100.0   | (95% CI: 95.4%; 100%)  | 100.0   | (95% CI: 40.4%; 100%)  | 98.8    | (95% CI: 97.8%; 99.4%) |



| Evaluation ID | Manufacturer                                            | Device                                                                 | Lot Number    | Panel   | Assay Type   | Target                 | Regulatory Status | Analyte  | PPA (%) | PPA CI                 | NPA (%) | NPA CI                 | PPV (%) | PPV CI                 | NPV (%) | NPV CI                 |
|---------------|---------------------------------------------------------|------------------------------------------------------------------------|---------------|---------|--------------|------------------------|-------------------|----------|---------|------------------------|---------|------------------------|---------|------------------------|---------|------------------------|
| maf3319-a001  | Beijing Wantai Biological Pharmacy Enterprise Co., Ltd. | WANTAI SARS-CoV-2 Ab ELISA                                             | NCOA 20200401 | Panel 2 | ELISA        | Spike                  | EUA Authorized    | Combined | 96.7    | (95% CI: 83.3%; 99.4%) | 97.5    | (95% CI: 91.3%; 99.3%) | 67.1    | (95% CI: 33.6%; 88.4%) | 99.8    | (95% CI: 99.0%; 100%)  |
| maf3319-a001  | Beijing Wantai Biological Pharmacy Enterprise Co., Ltd. | WANTAI SARS-CoV-2 Ab ELISA                                             | NCOA 20200401 | Panel 2 | ELISA        | Spike                  | EUA Authorized    | Pan Ig   | 96.7    | (95% CI: 83.3%; 99.4%) | 97.5    | (95% CI: 91.3%; 99.3%) | 67.1    | (95% CI: 33.6%; 88.4%) | 99.8    | (95% CI: 99.0%; 100%)  |
| maf3327-a001  | Zeus Scientific, Inc.                                   | SARS-CoV-2 IgG Test System                                             | 20060295      | Panel 2 | ELISA        | Spike and Nucleocapsid | EUA Authorized    | Combined | 93.3    | (95% CI: 78.7%; 98.2%) | 100.0   | (95% CI: 94.8%; 100%)  | 100.0   | (95% CI: 44.3%; 100%)  | 99.7    | (95% CI: 98.8%; 99.9%) |
| maf3327-a001  | Zeus Scientific, Inc.                                   | SARS-CoV-2 IgG Test System                                             | 20060295      | Panel 2 | ELISA        | Spike and Nucleocapsid | EUA Authorized    | IgG      | 93.3    | (95% CI: 78.7%; 98.2%) | 100.0   | (95% CI: 94.8%; 100%)  | 100.0   | (95% CI: 44.3%; 100%)  | 99.7    | (95% CI: 98.8%; 99.9%) |
| maf3260-a001  | Biohit Healthcare (Hefei) Co., Ltd.                     | SARS-CoV-2 IgM/IgG Antibody Test Kit                                   | SA200301      | Panel 2 | Lateral Flow | Nucleocapsid           | EUA Authorized    | Combined | 96.7    | (95% CI: 83.3%; 99.4%) | 95.0    | (95% CI: 87.8%; 98.0%) | 50.4    | (95% CI: 26.5%; 72.7%) | 99.8    | (95% CI: 99.0%; 100%)  |
| maf3260-a001  | Biohit Healthcare (Hefei) Co., Ltd.                     | SARS-CoV-2 IgM/IgG Antibody Test Kit                                   | SA200301      | Panel 2 | Lateral Flow | Nucleocapsid           | EUA Authorized    | IgG      | 96.7    | (95% CI: 83.3%; 99.4%) | 95.0    | (95% CI: 87.8%; 98.0%) | 50.4    | (95% CI: 26.5%; 72.7%) | 99.8    | (95% CI: 99.0%; 100%)  |
| maf3260-a001  | Biohit Healthcare (Hefei) Co., Ltd.                     | SARS-CoV-2 IgM/IgG Antibody Test Kit                                   | SA200301      | Panel 2 | Lateral Flow | Nucleocapsid           | EUA Authorized    | IgM      | 96.7    | (95% CI: 83.3%; 99.4%) | 95.0    | (95% CI: 87.8%; 98.0%) | 50.4    | (95% CI: 26.5%; 72.7%) | 99.8    | (95% CI: 99.0%; 100%)  |
| maf3261-a001  | Biolidics Ltd                                           | 2019-nCoV IgG/IgM Detection Kit (Colloidal Gold)                       | V5020041352 A | Panel 2 | Lateral Flow | Unknown                | Not Authorized    | Combined | 96.7    | (95% CI: 83.3%; 99.4%) | 96.2    | (95% CI: 89.4%; 98.7%) | 57.3    | (95% CI: 29.3%; 80.1%) | 99.8    | (95% CI: 99.0%; 100%)  |
| maf3261-a001  | Biolidics Ltd                                           | 2019-nCoV IgG/IgM Detection Kit (Colloidal Gold)                       | V5020041352 A | Panel 2 | Lateral Flow | Unknown                | Not Authorized    | IgG      | 96.7    | (95% CI: 83.3%; 99.4%) | 96.2    | (95% CI: 89.4%; 98.7%) | 57.3    | (95% CI: 29.3%; 80.1%) | 99.8    | (95% CI: 99.0%; 100%)  |
| maf3261-a001  | Biolidics Ltd                                           | 2019-nCoV IgG/IgM Detection Kit (Colloidal Gold)                       | V5020041352 A | Panel 2 | Lateral Flow | Unknown                | Not Authorized    | IgM      | 33.3    | (95% CI: 19.2%; 51.2%) | 97.5    | (95% CI: 91.2%; 99.3%) | 40.9    | (95% CI: 10.3%; 79.5%) | 96.5    | (95% CI: 95.5%; 97.5%) |
| maf3275-a001  | Sugentech, Inc.                                         | Sugentech SGTi-flex COVID-19 IgM/IgG                                   | COVT20906     | Panel 2 | Lateral Flow | Unknown                | Not Authorized    | Combined | 100.0   | (95% CI: 88.6%; 100%)  | 90.0    | (95% CI: 81.5%; 94.8%) | 34.5    | (95% CI: 20.1%; 50.5%) | 100.0   | (95% CI: 99.3%; 100%)  |
| maf3275-a001  | Sugentech, Inc.                                         | Sugentech SGTi-flex COVID-19 IgM/IgG                                   | COVT20906     | Panel 2 | Lateral Flow | Unknown                | Not Authorized    | IgG      | 93.3    | (95% CI: 78.7%; 98.2%) | 100.0   | (95% CI: 95.4%; 100%)  | 100.0   | (95% CI: 47.5%; 100%)  | 99.7    | (95% CI: 98.8%; 99.9%) |
| maf3275-a001  | Sugentech, Inc.                                         | Sugentech SGTi-flex COVID-19 IgM/IgG                                   | COVT20906     | Panel 2 | Lateral Flow | Unknown                | Not Authorized    | IgM      | 93.3    | (95% CI: 78.7%; 98.2%) | 90.0    | (95% CI: 81.5%; 94.8%) | 32.9    | (95% CI: 18.3%; 50.1%) | 99.6    | (95% CI: 98.6%; 99.9%) |
| maf3262-a001  | Xiamen Biotime Biotechnology Co., Ltd.                  | Biotime SARS-CoV-2 IgG/IgM Rapid Qualitative Test                      | X2003602      | Panel 2 | Lateral Flow | Spike                  | EUA Authorized    | Combined | 100.0   | (95% CI: 88.6%; 100%)  | 96.3    | (95% CI: 89.5%; 98.7%) | 58.4    | (95% CI: 30.9%; 80.4%) | 100.0   | (95% CI: 99.3%; 100%)  |
| maf3262-a001  | Xiamen Biotime Biotechnology Co., Ltd.                  | Biotime SARS-CoV-2 IgG/IgM Rapid Qualitative Test                      | X2003602      | Panel 2 | Lateral Flow | Spike                  | EUA Authorized    | IgG      | 96.7    | (95% CI: 83.3%; 99.4%) | 97.5    | (95% CI: 91.3%; 99.3%) | 67.1    | (95% CI: 33.6%; 88.4%) | 99.8    | (95% CI: 99.0%; 100%)  |
| maf3262-a001  | Xiamen Biotime Biotechnology Co., Ltd.                  | Biotime SARS-CoV-2 IgG/IgM Rapid Qualitative Test                      | X2003602      | Panel 2 | Lateral Flow | Spike                  | EUA Authorized    | IgM      | 100.0   | (95% CI: 88.6%; 100%)  | 98.8    | (95% CI: 93.3%; 99.8%) | 80.8    | (95% CI: 40.9%; 96.0%) | 100.0   | (95% CI: 99.4%; 100%)  |
| maf3278-a001  | Nanjing Vazyme Medical Technology Co. LTD               | Vazyme 2019-nCoV IgG/IgM Detection Kit (Colloidal Gold-Based)          | 5020042252B   | Panel 2 | Lateral Flow | Unknown                | Not Authorized    | Combined | 96.7    | (95% CI: 83.3%; 99.4%) | 68.8    | (95% CI: 57.9%; 77.8%) | 14.0    | (95% CI: 9.4%; 19.1%)  | 99.7    | (95% CI: 98.5%; 100%)  |
| maf3278-a001  | Nanjing Vazyme Medical Technology Co. LTD               | Vazyme 2019-nCoV IgG/IgM Detection Kit (Colloidal Gold-Based)          | 5020042252B   | Panel 2 | Lateral Flow | Unknown                | Not Authorized    | IgG      | 96.7    | (95% CI: 83.3%; 99.4%) | 90.0    | (95% CI: 81.5%; 94.8%) | 33.7    | (95% CI: 19.2%; 50.4%) | 99.8    | (95% CI: 98.9%; 100%)  |
| maf3278-a001  | Nanjing Vazyme Medical Technology Co. LTD               | Vazyme 2019-nCoV IgG/IgM Detection Kit (Colloidal Gold-Based)          | 5020042252B   | Panel 2 | Lateral Flow | Unknown                | Not Authorized    | IgM      | 66.7    | (95% CI: 48.8%; 80.8%) | 77.5    | (95% CI: 67.2%; 85.3%) | 13.5    | (95% CI: 7.3%; 22.4%)  | 97.8    | (95% CI: 96.1%; 98.8%) |
| maf3283-a001  | MEDsan GmbH                                             | MEDsan biological health solutions, MEDsan COVID-19 IgM/IgG Rapid Test | NA            | Panel 2 | Lateral Flow | Unknown                | Not Authorized    | Combined | 90.0    | (95% CI: 74.4%; 96.5%) | 92.5    | (95% CI: 84.6%; 96.5%) | 38.7    | (95% CI: 20.3%; 59.3%) | 99.4    | (95% CI: 98.4%; 99.8%) |
| maf3283-a001  | MEDsan GmbH                                             | MEDsan biological health solutions, MEDsan COVID-19 IgM/IgG Rapid Test | NA            | Panel 2 | Lateral Flow | Unknown                | Not Authorized    | IgG      | 90.0    | (95% CI: 74.4%; 96.5%) | 93.8    | (95% CI: 86.2%; 97.3%) | 43.1    | (95% CI: 22.1%; 65.3%) | 99.4    | (95% CI: 98.5%; 99.8%) |
| maf3283-a001  | MEDsan GmbH                                             | MEDsan biological health solutions, MEDsan COVID-19 IgM/IgG Rapid Test | NA            | Panel 2 | Lateral Flow | Unknown                | Not Authorized    | IgM      | 90.0    | (95% CI: 74.4%; 96.5%) | 96.3    | (95% CI: 89.5%; 98.7%) | 55.8    | (95% CI: 27.2%; 79.8%) | 99.5    | (95% CI: 98.5%; 99.8%) |

| Evaluation ID | Manufacturer                                        | Device                                                                                                  | Lot Number    | Panel   | Assay Type   | Target                 | Regulatory Status | Analyte  | PPA (%) | PPA CI                 | NPA (%) | NPA CI                 | PPV (%) | PPV CI                 | NPV (%) | NPV CI                 |
|---------------|-----------------------------------------------------|---------------------------------------------------------------------------------------------------------|---------------|---------|--------------|------------------------|-------------------|----------|---------|------------------------|---------|------------------------|---------|------------------------|---------|------------------------|
| maf3287-a001  | RayBiotech                                          | Novel Coronavirus (SARS-CoV-2) IgM and IgG Dual Combined Antibody Detection Kit (Colloidal Gold Method) | 505202977     | Panel 2 | Lateral Flow | Unknown                | Not Authorized    | Combined | 70.0    | (95% CI: 52.1%; 83.3%) | 57.5    | (95% CI: 46.6%; 67.7%) | 8.0     | (95% CI: 4.9%; 12.0%)  | 97.3    | (95% CI: 94.9%; 98.7%) |
| maf3287-a001  | RayBiotech                                          | Novel Coronavirus (SARS-CoV-2) IgM and IgG Dual Combined Antibody Detection Kit (Colloidal Gold Method) | 505202977     | Panel 2 | Lateral Flow | Unknown                | Not Authorized    | IgG      | 46.7    | (95% CI: 30.2%; 63.9%) | 100.0   | (95% CI: 95.4%; 100%)  | 100.0   | (95% CI: 25.8%; 100%)  | 97.3    | (95% CI: 96.3%; 98.1%) |
| maf3287-a001  | RayBiotech                                          | Novel Coronavirus (SARS-CoV-2) IgM and IgG Dual Combined Antibody Detection Kit (Colloidal Gold Method) | 505202977     | Panel 2 | Lateral Flow | Unknown                | Not Authorized    | IgM      | 60.0    | (95% CI: 42.3%; 75.4%) | 57.5    | (95% CI: 46.6%; 67.7%) | 6.9     | (95% CI: 4.0%; 11.0%)  | 96.5    | (95% CI: 93.9%; 98.1%) |
| maf3282-a001  | Innovita (Tangshan) Biological Technology Co., Ltd. | One Step Rapid Test 2019-nCoV Ab Test (Colloidal Gold) IgM/IgG Whole Blood/Serum/Plasma Combo           | 20200405      | Panel 2 | Lateral Flow | Spike and Nucleocapsid | EUA Authorized    | Combined | 100.0   | (95% CI: 88.6%; 100%)  | 97.5    | (95% CI: 91.3%; 99.3%) | 67.8    | (95% CI: 35.0%; 88.4%) | 100.0   | (95% CI: 99.4%; 100%)  |
| maf3282-a001  | Innovita (Tangshan) Biological Technology Co., Ltd. | One Step Rapid Test 2019-nCoV Ab Test (Colloidal Gold) IgM/IgG Whole Blood/Serum/Plasma Combo           | 20200405      | Panel 2 | Lateral Flow | Spike and Nucleocapsid | EUA Authorized    | IgG      | 93.3    | (95% CI: 78.7%; 98.2%) | 98.8    | (95% CI: 93.3%; 99.8%) | 79.7    | (95% CI: 38.0%; 95.9%) | 99.6    | (95% CI: 98.8%; 99.9%) |
| maf3282-a001  | Innovita (Tangshan) Biological Technology Co., Ltd. | One Step Rapid Test 2019-nCoV Ab Test (Colloidal Gold) IgM/IgG Whole Blood/Serum/Plasma Combo           | 20200405      | Panel 2 | Lateral Flow | Spike and Nucleocapsid | EUA Authorized    | IgM      | 93.3    | (95% CI: 78.7%; 98.2%) | 98.8    | (95% CI: 93.3%; 99.8%) | 79.7    | (95% CI: 38.0%; 95.9%) | 99.6    | (95% CI: 98.8%; 99.9%) |
| maf3299-a001  | Access Bio Inc.                                     | CareStart COVID-19 IgM/IgG Rapid Diagnostic Test for the Detection of SARS-CoV-2 IgM/IgG Ab             | C120E68       | Panel 2 | Lateral Flow | Spike and Nucleocapsid | EUA Authorized    | Combined | 100.0   | (95% CI: 88.6%; 100%)  | 97.5    | (95% CI: 91.3%; 99.3%) | 67.8    | (95% CI: 35.0%; 88.4%) | 100.0   | (95% CI: 99.4%; 100%)  |
| maf3299-a001  | Access Bio Inc.                                     | CareStart COVID-19 IgM/IgG Rapid Diagnostic Test for the Detection of SARS-CoV-2 IgM/IgG Ab             | C120E68       | Panel 2 | Lateral Flow | Spike and Nucleocapsid | EUA Authorized    | IgG      | 100.0   | (95% CI: 88.6%; 100%)  | 98.8    | (95% CI: 93.3%; 99.8%) | 80.8    | (95% CI: 40.9%; 96.0%) | 100.0   | (95% CI: 99.4%; 100%)  |
| maf3299-a001  | Access Bio Inc.                                     | CareStart COVID-19 IgM/IgG Rapid Diagnostic Test for the Detection of SARS-CoV-2 IgM/IgG Ab             | C120E68       | Panel 2 | Lateral Flow | Spike and Nucleocapsid | EUA Authorized    | IgM      | 90.0    | (95% CI: 74.4%; 96.5%) | 98.8    | (95% CI: 93.3%; 99.8%) | 79.1    | (95% CI: 36.7%; 95.8%) | 99.5    | (95% CI: 98.6%; 99.8%) |
| maf3328-a001  | BioMedomics, Inc.                                   | BioMedomics COVID-19 IgM-IgG Rapid Test                                                                 | 51-200511     | Panel 2 | Lateral Flow | Unknown                | Not Authorized    | Combined | 100.0   | (95% CI: 88.6%; 100%)  | 92.5    | (95% CI: 84.6%; 96.5%) | 41.2    | (95% CI: 23.2%; 60.2%) | 100.0   | (95% CI: 99.3%; 100%)  |
| maf3328-a001  | BioMedomics, Inc.                                   | BioMedomics COVID-19 IgM-IgG Rapid Test                                                                 | 51-200511     | Panel 2 | Lateral Flow | Unknown                | Not Authorized    | IgG      | 96.7    | (95% CI: 83.3%; 99.4%) | 96.3    | (95% CI: 89.5%; 98.7%) | 57.6    | (95% CI: 29.6%; 80.3%) | 99.8    | (95% CI: 99.0%; 100%)  |
| maf3328-a001  | BioMedomics, Inc.                                   | BioMedomics COVID-19 IgM-IgG Rapid Test                                                                 | 51-200511     | Panel 2 | Lateral Flow | Unknown                | Not Authorized    | IgM      | 86.7    | (95% CI: 70.3%; 94.7%) | 97.1    | (95% CI: 90.2%; 99.2%) | 61.5    | (95% CI: 27.3%; 86.4%) | 99.3    | (95% CI: 98.3%; 99.7%) |
| maf3285-a001  | Zhuhai Livzon Diagnostics Inc                       | Livzon IgM/IgG Diagnostic Kit for IgM/IgG Antibody to Coronavirus (SARS-Cov-2) Lateral Flow             | CK 2004350410 | Panel 2 | Lateral Flow | Unknown                | Not Authorized    | Combined | 86.7    | (95% CI: 70.3%; 94.7%) | 97.5    | (95% CI: 91.3%; 99.3%) | 64.6    | (95% CI: 29.9%; 87.9%) | 99.3    | (95% CI: 98.3%; 99.7%) |
| maf3285-a001  | Zhuhai Livzon Diagnostics Inc                       | Livzon IgM/IgG Diagnostic Kit for IgM/IgG Antibody to Coronavirus (SARS-Cov-2) Lateral Flow             | CK 2004350410 | Panel 2 | Lateral Flow | Unknown                | Not Authorized    | IgG      | 66.7    | (95% CI: 48.8%; 80.8%) | 100.0   | (95% CI: 95.4%; 100%)  | 100.0   | (95% CI: 35.9%; 100%)  | 98.3    | (95% CI: 97.3%; 99.0%) |
| maf3285-a001  | Zhuhai Livzon Diagnostics Inc                       | Livzon IgM/IgG Diagnostic Kit for IgM/IgG Antibody to Coronavirus (SARS-Cov-2) Lateral Flow             | CK 2004350410 | Panel 2 | Lateral Flow | Unknown                | Not Authorized    | IgM      | 86.7    | (95% CI: 70.3%; 94.7%) | 97.5    | (95% CI: 91.3%; 99.3%) | 64.6    | (95% CI: 29.9%; 87.9%) | 99.3    | (95% CI: 98.3%; 99.7%) |

| Evaluation ID | Manufacturer                               | Device                                                                 | Lot Number    | Panel   | Assay Type   | Target                 | Regulatory Status | Analyte  | PPA (%) | PPA CI                 | NPA (%) | NPA CI                 | PPV (%) | PPV CI                 | NPV (%) | NPV CI                 |
|---------------|--------------------------------------------|------------------------------------------------------------------------|---------------|---------|--------------|------------------------|-------------------|----------|---------|------------------------|---------|------------------------|---------|------------------------|---------|------------------------|
| maf3288-a001  | Zhongshan Bio-Tech Co LTD                  | SARS-CoV-2 IgM-IgG (GICA)                                              | 2020007       | Panel 2 | Lateral Flow | Unknown                | Not Authorized    | Combined | 96.7    | (95% CI: 83.3%; 99.4%) | 83.8    | (95% CI: 74.2%; 90.3%) | 23.8    | (95% CI: 14.5%; 34.9%) | 99.8    | (95% CI: 98.8%; 100%)  |
| maf3288-a001  | Zhongshan Bio-Tech Co LTD                  | SARS-CoV-2 IgM-IgG (GICA)                                              | 2020007       | Panel 2 | Lateral Flow | Unknown                | Not Authorized    | IgG      | 96.7    | (95% CI: 83.3%; 99.4%) | 85.0    | (95% CI: 75.6%; 91.2%) | 25.3    | (95% CI: 15.2%; 37.3%) | 99.8    | (95% CI: 98.9%; 100%)  |
| maf3288-a001  | Zhongshan Bio-Tech Co LTD                  | SARS-CoV-2 IgM-IgG (GICA)                                              | 2020007       | Panel 2 | Lateral Flow | Unknown                | Not Authorized    | IgM      | 50.0    | (95% CI: 33.2%; 66.8%) | 97.5    | (95% CI: 91.3%; 99.3%) | 51.3    | (95% CI: 16.8%; 83.6%) | 97.4    | (95% CI: 96.3%; 98.3%) |
| maf3290-a001  | Biocan Diagnostics Inc                     | biocan Tell Me Fast Novel Coronavirus (COVID-19) IgG/IgM Antibody Test | B251CB 170320 | Panel 2 | Lateral Flow | Spike and Nucleocapsid | EUA Authorized    | Combined | 93.3    | (95% CI: 78.7%; 98.2%) | 96.2    | (95% CI: 89.4%; 98.7%) | 56.4    | (95% CI: 28.1%; 79.9%) | 99.6    | (95% CI: 98.8%; 99.9%) |
| maf3290-a001  | Biocan Diagnostics Inc                     | biocan Tell Me Fast Novel Coronavirus (COVID-19) IgG/IgM Antibody Test | B251CB 170320 | Panel 2 | Lateral Flow | Spike and Nucleocapsid | EUA Authorized    | IgG      | 93.3    | (95% CI: 78.7%; 98.2%) | 96.2    | (95% CI: 89.4%; 98.7%) | 56.4    | (95% CI: 28.1%; 79.9%) | 99.6    | (95% CI: 98.8%; 99.9%) |
| maf3290-a001  | Biocan Diagnostics Inc                     | biocan Tell Me Fast Novel Coronavirus (COVID-19) IgG/IgM Antibody Test | B251CB 170320 | Panel 2 | Lateral Flow | Spike and Nucleocapsid | EUA Authorized    | IgM      | 90.0    | (95% CI: 74.4%; 96.5%) | 98.7    | (95% CI: 93.2%; 99.8%) | 78.9    | (95% CI: 36.4%; 95.8%) | 99.5    | (95% CI: 98.6%; 99.8%) |
| maf3320-a001  | LumiQuick Diagnostics                      | Quick Profile 2019-nCoV IgG/IgM Test Card                              | 20042919      | Panel 2 | Lateral Flow | Unknown                | Not Authorized    | Combined | 96.7    | (95% CI: 83.3%; 99.4%) | 90.0    | (95% CI: 81.5%; 94.8%) | 33.7    | (95% CI: 19.2%; 50.4%) | 99.8    | (95% CI: 98.9%; 100%)  |
| maf3320-a001  | LumiQuick Diagnostics                      | Quick Profile 2019-nCoV IgG/IgM Test Card                              | 20042919      | Panel 2 | Lateral Flow | Unknown                | Not Authorized    | IgG      | 96.7    | (95% CI: 83.3%; 99.4%) | 96.3    | (95% CI: 89.5%; 98.7%) | 57.6    | (95% CI: 29.6%; 80.3%) | 99.8    | (95% CI: 99.0%; 100%)  |
| maf3320-a001  | LumiQuick Diagnostics                      | Quick Profile 2019-nCoV IgG/IgM Test Card                              | 20042919      | Panel 2 | Lateral Flow | Unknown                | Not Authorized    | IgM      | 86.7    | (95% CI: 70.3%; 94.7%) | 93.8    | (95% CI: 86.2%; 97.3%) | 42.2    | (95% CI: 21.1%; 64.9%) | 99.3    | (95% CI: 98.2%; 99.7%) |
| maf3281-a001  | Guangzhou Fenghua Bioengineering Co., Ltd. | SARS-COV-2 IgM/IgG Combo Rapid Test Kit                                | 20200508      | Panel 2 | Lateral Flow | Unknown                | Not Authorized    | Combined | 80.0    | (95% CI: 62.7%; 90.5%) | 62.5    | (95% CI: 51.5%; 72.3%) | 10.1    | (95% CI: 6.4%; 14.7%)  | 98.3    | (95% CI: 96.3%; 99.3%) |
| maf3281-a001  | Guangzhou Fenghua Bioengineering Co., Ltd. | SARS-COV-2 IgM/IgG Combo Rapid Test Kit                                | 20200508      | Panel 2 | Lateral Flow | Unknown                | Not Authorized    | IgG      | 70.0    | (95% CI: 52.1%; 83.3%) | 95.0    | (95% CI: 87.8%; 98.0%) | 42.4    | (95% CI: 18.4%; 69.1%) | 98.4    | (95% CI: 97.2%; 99.1%) |
| maf3281-a001  | Guangzhou Fenghua Bioengineering Co., Ltd. | SARS-COV-2 IgM/IgG Combo Rapid Test Kit                                | 20200508      | Panel 2 | Lateral Flow | Unknown                | Not Authorized    | IgM      | 70.0    | (95% CI: 52.1%; 83.3%) | 65.0    | (95% CI: 54.1%; 74.5%) | 9.5     | (95% CI: 5.6%; 14.7%)  | 97.6    | (95% CI: 95.5%; 98.8%) |
| maf3284-a001  | Abbexa                                     | COVID-19 IgG/IgM Rapid Test Kit                                        | L20Z4852X     | Panel 2 | Lateral Flow | Unknown                | Not Authorized    | Combined | 96.7    | (95% CI: 83.3%; 99.4%) | 92.5    | (95% CI: 84.6%; 96.5%) | 40.4    | (95% CI: 22.2%; 60.0%) | 99.8    | (95% CI: 99.0%; 100%)  |
| maf3284-a001  | Abbexa                                     | COVID-19 IgG/IgM Rapid Test Kit                                        | L20Z4852X     | Panel 2 | Lateral Flow | Unknown                | Not Authorized    | IgG      | 96.7    | (95% CI: 83.3%; 99.4%) | 96.3    | (95% CI: 89.5%; 98.7%) | 57.6    | (95% CI: 29.6%; 80.3%) | 99.8    | (95% CI: 99.0%; 100%)  |
| maf3284-a001  | Abbexa                                     | COVID-19 IgG/IgM Rapid Test Kit                                        | L20Z4852X     | Panel 2 | Lateral Flow | Unknown                | Not Authorized    | IgM      | 53.3    | (95% CI: 36.1%; 69.8%) | 96.3    | (95% CI: 89.5%; 98.7%) | 42.8    | (95% CI: 15.4%; 74.1%) | 97.5    | (95% CI: 96.4%; 98.4%) |
| maf3286-a001  | PCL, Inc.                                  | PCL COVID19 IgG/IgM Rapid Gold                                         | COV03-200325  | Panel 2 | Lateral Flow | Unknown                | Not Authorized    | Combined | 96.7    | (95% CI: 83.3%; 99.4%) | 100.0   | (95% CI: 94.8%; 100%)  | 100.0   | (95% CI: 45.7%; 100%)  | 99.8    | (95% CI: 99.1%; 100%)  |
| maf3286-a001  | PCL, Inc.                                  | PCL COVID19 IgG/IgM Rapid Gold                                         | COV03-200325  | Panel 2 | Lateral Flow | Unknown                | Not Authorized    | IgG      | 80.0    | (95% CI: 62.7%; 90.5%) | 100.0   | (95% CI: 94.8%; 100%)  | 100.0   | (95% CI: 38.8%; 100%)  | 99.0    | (95% CI: 98.0%; 99.5%) |
| maf3286-a001  | PCL, Inc.                                  | PCL COVID19 IgG/IgM Rapid Gold                                         | COV03-200325  | Panel 2 | Lateral Flow | Unknown                | Not Authorized    | IgM      | 93.3    | (95% CI: 78.7%; 98.2%) | 100.0   | (95% CI: 94.8%; 100%)  | 100.0   | (95% CI: 44.3%; 100%)  | 99.7    | (95% CI: 98.8%; 99.9%) |
| maf3297-a001  | Jiangsu Dablood Pharmaceutical Co. Ltd     | COVID-19 IgM/IgG One Step Rapid Test                                   | NA            | Panel 2 | Lateral Flow | Unknown                | Not Authorized    | Combined | 100.0   | (95% CI: 88.6%; 100%)  | 81.3    | (95% CI: 71.3%; 88.3%) | 21.9    | (95% CI: 14.0%; 31.0%) | 100.0   | (95% CI: 99.2%; 100%)  |
| maf3297-a001  | Jiangsu Dablood Pharmaceutical Co. Ltd     | COVID-19 IgM/IgG One Step Rapid Test                                   | NA            | Panel 2 | Lateral Flow | Unknown                | Not Authorized    | IgG      | 100.0   | (95% CI: 88.6%; 100%)  | 82.5    | (95% CI: 72.7%; 89.3%) | 23.1    | (95% CI: 14.6%; 32.9%) | 100.0   | (95% CI: 99.2%; 100%)  |
| maf3297-a001  | Jiangsu Dablood Pharmaceutical Co. Ltd     | COVID-19 IgM/IgG One Step Rapid Test                                   | NA            | Panel 2 | Lateral Flow | Unknown                | Not Authorized    | IgM      | 93.3    | (95% CI: 78.7%; 98.2%) | 97.5    | (95% CI: 91.3%; 99.3%) | 66.3    | (95% CI: 32.3%; 88.2%) | 99.6    | (95% CI: 98.8%; 99.9%) |
| maf3292-a001  | H-Guard (China) Co., Ltd.                  | Novel Coronavirus COVID-19 IgM/IgG Test Kit (colloidal gold)           | 20200406      | Panel 2 | Lateral Flow | Unknown                | Not Authorized    | Combined | 96.7    | (95% CI: 83.3%; 99.4%) | 93.8    | (95% CI: 86.2%; 97.3%) | 44.9    | (95% CI: 24.1%; 66.0%) | 99.8    | (95% CI: 99.0%; 100%)  |
| maf3292-a001  | H-Guard (China) Co., Ltd.                  | Novel Coronavirus COVID-19 IgM/IgG Test Kit (colloidal gold)           | 20200406      | Panel 2 | Lateral Flow | Unknown                | Not Authorized    | IgG      | 93.3    | (95% CI: 78.7%; 98.2%) | 97.5    | (95% CI: 91.3%; 99.3%) | 66.3    | (95% CI: 32.3%; 88.2%) | 99.6    | (95% CI: 98.8%; 99.9%) |

| Evaluation ID | Manufacturer                              | Device                                                                                 | Lot Number | Panel   | Assay Type   | Target                 | Regulatory Status | Analyte  | PPA (%) | PPA CI                 | NPA (%) | NPA CI                 | PPV (%) | PPV CI                 | NPV (%) | NPV CI                 |
|---------------|-------------------------------------------|----------------------------------------------------------------------------------------|------------|---------|--------------|------------------------|-------------------|----------|---------|------------------------|---------|------------------------|---------|------------------------|---------|------------------------|
| maf3292-a001  | H-Guard (China) Co., Ltd.                 | Novel Coronavirus COVID-19 IgM/IgG Test Kit (colloidal gold)                           | 20200406   | Panel 2 | Lateral Flow | Unknown                | Not Authorized    | IgM      | 53.3    | (95% CI: 36.1%; 69.8%) | 96.3    | (95% CI: 89.5%; 98.7%) | 42.8    | (95% CI: 15.4%; 74.1%) | 97.5    | (95% CI: 96.4%; 98.4%) |
| maf3293-a001  | Salofa Oy                                 | Sienna COVID-19 IgG/IgM Rapid Test Cassette (whole blood/serum/plasma)                 | 20052003   | Panel 2 | Lateral Flow | Spike                  | EUA Authorized    | Combined | 93.3    | (95% CI: 78.7%; 98.2%) | 98.8    | (95% CI: 93.3%; 99.8%) | 79.7    | (95% CI: 38.0%; 95.9%) | 99.6    | (95% CI: 98.8%; 99.9%) |
| maf3293-a001  | Salofa Oy                                 | Sienna COVID-19 IgG/IgM Rapid Test Cassette (whole blood/serum/plasma)                 | 20052003   | Panel 2 | Lateral Flow | Spike                  | EUA Authorized    | IgG      | 93.3    | (95% CI: 78.7%; 98.2%) | 98.8    | (95% CI: 93.3%; 99.8%) | 79.7    | (95% CI: 38.0%; 95.9%) | 99.6    | (95% CI: 98.8%; 99.9%) |
| maf3293-a001  | Salofa Oy                                 | Sienna COVID-19 IgG/IgM Rapid Test Cassette (whole blood/serum/plasma)                 | 20052003   | Panel 2 | Lateral Flow | Spike                  | EUA Authorized    | IgM      | 90.0    | (95% CI: 74.4%; 96.5%) | 100.0   | (95% CI: 95.4%; 100%)  | 100.0   | (95% CI: 46.1%; 100%)  | 99.5    | (95% CI: 98.6%; 99.8%) |
| maf3289-a001  | Assure Tech. (Hangzhou) Co., Ltd.         | FaStep Rapid Diagnostic Test Coronavirus Disease 2019/ (COVID-2019) IgG/IgM Rapid Test | I2003183   | Panel 2 | Lateral Flow | Spike and Nucleocapsid | EUA Authorized    | Combined | 100.0   | (95% CI: 88.6%; 100%)  | 98.8    | (95% CI: 93.3%; 99.8%) | 80.8    | (95% CI: 40.9%; 96.0%) | 100.0   | (95% CI: 99.4%; 100%)  |
| maf3289-a001  | Assure Tech. (Hangzhou) Co., Ltd.         | FaStep Rapid Diagnostic Test Coronavirus Disease 2019/ (COVID-2019) IgG/IgM Rapid Test | I2003183   | Panel 2 | Lateral Flow | Spike and Nucleocapsid | EUA Authorized    | IgG      | 90.0    | (95% CI: 74.4%; 96.5%) | 100.0   | (95% CI: 95.4%; 100%)  | 100.0   | (95% CI: 46.1%; 100%)  | 99.5    | (95% CI: 98.6%; 99.8%) |
| maf3289-a001  | Assure Tech. (Hangzhou) Co., Ltd.         | FaStep Rapid Diagnostic Test Coronavirus Disease 2019/ (COVID-2019) IgG/IgM Rapid Test | I2003183   | Panel 2 | Lateral Flow | Spike and Nucleocapsid | EUA Authorized    | IgM      | 100.0   | (95% CI: 88.6%; 100%)  | 98.8    | (95% CI: 93.3%; 99.8%) | 80.8    | (95% CI: 40.9%; 96.0%) | 100.0   | (95% CI: 99.4%; 100%)  |
| maf3291-a001  | Hangzhou Laihe Biotech Co., Ltd.          | Novel Coronavirus (2019-nCoV) IgM/IgG Antibody Combo Test Kit (Colloidal Gold)         | 2005037    | Panel 2 | Lateral Flow | Spike                  | EUA Authorized    | Combined | 100.0   | (95% CI: 88.6%; 100%)  | 98.8    | (95% CI: 93.3%; 99.8%) | 80.8    | (95% CI: 40.9%; 96.0%) | 100.0   | (95% CI: 99.4%; 100%)  |
| maf3291-a001  | Hangzhou Laihe Biotech Co., Ltd.          | Novel Coronavirus (2019-nCoV) IgM/IgG Antibody Combo Test Kit (Colloidal Gold)         | 2005037    | Panel 2 | Lateral Flow | Spike                  | EUA Authorized    | IgG      | 100.0   | (95% CI: 88.6%; 100%)  | 98.8    | (95% CI: 93.3%; 99.8%) | 80.8    | (95% CI: 40.9%; 96.0%) | 100.0   | (95% CI: 99.4%; 100%)  |
| maf3291-a001  | Hangzhou Laihe Biotech Co., Ltd.          | Novel Coronavirus (2019-nCoV) IgM/IgG Antibody Combo Test Kit (Colloidal Gold)         | 2005037    | Panel 2 | Lateral Flow | Spike                  | EUA Authorized    | IgM      | 96.7    | (95% CI: 83.3%; 99.4%) | 100.0   | (95% CI: 95.4%; 100%)  | 100.0   | (95% CI: 48.9%; 100%)  | 99.8    | (95% CI: 99.1%; 100%)  |
| maf3298-a001  | Tianjin New Bay Bioresearch C. #1         | Quik Pac II COVID-19 IgG & IgM Test                                                    | 2005059    | Panel 2 | Lateral Flow | Unknown                | Not Authorized    | Combined | 96.7    | (95% CI: 83.3%; 99.4%) | 97.5    | (95% CI: 91.3%; 99.3%) | 67.1    | (95% CI: 33.6%; 88.4%) | 99.8    | (95% CI: 99.0%; 100%)  |
| maf3298-a001  | Tianjin New Bay Bioresearch C. #1         | Quik Pac II COVID-19 IgG & IgM Test                                                    | 2005059    | Panel 2 | Lateral Flow | Unknown                | Not Authorized    | IgG      | 73.3    | (95% CI: 55.6%; 85.8%) | 100.0   | (95% CI: 95.4%; 100%)  | 100.0   | (95% CI: 39.0%; 100%)  | 98.6    | (95% CI: 97.6%; 99.3%) |
| maf3298-a001  | Tianjin New Bay Bioresearch C. #1         | Quik Pac II COVID-19 IgG & IgM Test                                                    | 2005059    | Panel 2 | Lateral Flow | Unknown                | Not Authorized    | IgM      | 93.3    | (95% CI: 78.7%; 98.2%) | 97.5    | (95% CI: 91.3%; 99.3%) | 66.3    | (95% CI: 32.3%; 88.2%) | 99.6    | (95% CI: 98.8%; 99.9%) |
| maf3300-a001  | GenBody Inc.                              | GenBody COVID-19 IgM/IgG                                                               | FJFB30201  | Panel 2 | Lateral Flow | Unknown                | Not Authorized    | Combined | 60.0    | (95% CI: 42.3%; 75.4%) | 98.8    | (95% CI: 93.3%; 99.8%) | 71.6    | (95% CI: 24.8%; 94.7%) | 97.9    | (95% CI: 96.8%; 98.7%) |
| maf3300-a001  | GenBody Inc.                              | GenBody COVID-19 IgM/IgG                                                               | FJFB30201  | Panel 2 | Lateral Flow | Unknown                | Not Authorized    | IgG      | 56.7    | (95% CI: 39.2%; 72.6%) | 100.0   | (95% CI: 95.4%; 100%)  | 100.0   | (95% CI: 31.0%; 100%)  | 97.8    | (95% CI: 96.8%; 98.6%) |
| maf3300-a001  | GenBody Inc.                              | GenBody COVID-19 IgM/IgG                                                               | FJFB30201  | Panel 2 | Lateral Flow | Unknown                | Not Authorized    | IgM      | 40.0    | (95% CI: 24.6%; 57.7%) | 98.8    | (95% CI: 93.3%; 99.8%) | 62.7    | (95% CI: 16.1%; 93.2%) | 96.9    | (95% CI: 95.9%; 97.8%) |
| maf3304-a001  | Wuhan Easy Diagnosis Biomedicine Co. Ltd. | COVID-19 (SARS-CoV-2) IgM/IgG Antibody Test Kit                                        | 20030401   | Panel 2 | Lateral Flow | Unknown                | Not Authorized    | Combined | 100.0   | (95% CI: 88.6%; 100%)  | 87.5    | (95% CI: 78.5%; 93.1%) | 29.6    | (95% CI: 17.8%; 43.2%) | 100.0   | (95% CI: 99.2%; 100%)  |
| maf3304-a001  | Wuhan Easy Diagnosis Biomedicine Co. Ltd. | COVID-19 (SARS-CoV-2) IgM/IgG Antibody Test Kit                                        | 20030401   | Panel 2 | Lateral Flow | Unknown                | Not Authorized    | IgG      | 96.7    | (95% CI: 83.3%; 99.4%) | 98.8    | (95% CI: 93.3%; 99.8%) | 80.3    | (95% CI: 39.4%; 95.9%) | 99.8    | (95% CI: 99.1%; 100%)  |
| maf3304-a001  | Wuhan Easy Diagnosis Biomedicine Co. Ltd. | COVID-19 (SARS-CoV-2) IgM/IgG Antibody Test Kit                                        | 20030401   | Panel 2 | Lateral Flow | Unknown                | Not Authorized    | IgM      | 100.0   | (95% CI: 88.6%; 100%)  | 88.8    | (95% CI: 80.0%; 94.0%) | 31.9    | (95% CI: 18.9%; 46.6%) | 100.0   | (95% CI: 99.3%; 100%)  |

| Evaluation ID | Manufacturer                                            | Device                                                                     | Lot Number   | Panel   | Assay Type   | Target                 | Regulatory Status | Analyte  | PPA (%) | PPA CI                 | NPA (%) | NPA CI                 | PPV (%) | PPV CI                 | NPV (%) | NPV CI                 |
|---------------|---------------------------------------------------------|----------------------------------------------------------------------------|--------------|---------|--------------|------------------------|-------------------|----------|---------|------------------------|---------|------------------------|---------|------------------------|---------|------------------------|
| maf3303-a001  | BTNX Inc                                                | COVID-19 IgG/IgM Test Cassettes (Whole Blood/Serum/Plasma)                 | I2004027     | Panel 2 | Lateral Flow | Unknown                | Not Authorized    | Combined | 100.0   | (95% CI: 88.6%; 100%)  | 97.5    | (95% CI: 91.3%; 99.3%) | 67.8    | (95% CI: 35.0%; 88.4%) | 100.0   | (95% CI: 99.4%; 100%)  |
| maf3303-a001  | BTNX Inc                                                | COVID-19 IgG/IgM Test Cassettes (Whole Blood/Serum/Plasma)                 | I2004027     | Panel 2 | Lateral Flow | Unknown                | Not Authorized    | IgG      | 100.0   | (95% CI: 88.6%; 100%)  | 100.0   | (95% CI: 95.4%; 100%)  | 100.0   | (95% CI: 50.5%; 100%)  | 100.0   | (95% CI: 99.4%; 100%)  |
| maf3303-a001  | BTNX Inc                                                | COVID-19 IgG/IgM Test Cassettes (Whole Blood/Serum/Plasma)                 | I2004027     | Panel 2 | Lateral Flow | Unknown                | Not Authorized    | IgM      | 100.0   | (95% CI: 88.6%; 100%)  | 97.5    | (95% CI: 91.3%; 99.3%) | 67.8    | (95% CI: 35.0%; 88.4%) | 100.0   | (95% CI: 99.4%; 100%)  |
| maf3325-a001  | Hangzhou Realy Tech Co., LTD                            | COVID-19 IgG/IgM Rapid Device Test                                         | N01G17T      | Panel 2 | Lateral Flow | Unknown                | Not Authorized    | Combined | 96.7    | (95% CI: 83.3%; 99.4%) | 93.7    | (95% CI: 86.0%; 97.3%) | 44.6    | (95% CI: 23.9%; 65.7%) | 99.8    | (95% CI: 99.0%; 100%)  |
| maf3325-a001  | Hangzhou Realy Tech Co., LTD                            | COVID-19 IgG/IgM Rapid Device Test                                         | N01G17T      | Panel 2 | Lateral Flow | Unknown                | Not Authorized    | IgG      | 86.7    | (95% CI: 70.3%; 94.7%) | 97.5    | (95% CI: 91.2%; 99.3%) | 64.3    | (95% CI: 29.7%; 87.7%) | 99.3    | (95% CI: 98.3%; 99.7%) |
| maf3325-a001  | Hangzhou Realy Tech Co., LTD                            | COVID-19 IgG/IgM Rapid Device Test                                         | N01G17T      | Panel 2 | Lateral Flow | Unknown                | Not Authorized    | IgM      | 96.7    | (95% CI: 83.3%; 99.4%) | 94.9    | (95% CI: 87.7%; 98.0%) | 50.1    | (95% CI: 26.3%; 72.5%) | 99.8    | (95% CI: 99.0%; 100%)  |
| maf3307-a001  | TBG Biotechnology Corp                                  | SARS-CoV-2 IgG/IgM Rapid Test Kit                                          | FRS20051K    | Panel 2 | Lateral Flow | Spike and Nucleocapsid | EUA Authorized    | Combined | 93.3    | (95% CI: 78.7%; 98.2%) | 95.0    | (95% CI: 87.8%; 98.0%) | 49.6    | (95% CI: 25.4%; 72.5%) | 99.6    | (95% CI: 98.7%; 99.9%) |
| maf3307-a001  | TBG Biotechnology Corp                                  | SARS-CoV-2 IgG/IgM Rapid Test Kit                                          | FRS20051K    | Panel 2 | Lateral Flow | Spike and Nucleocapsid | EUA Authorized    | IgG      | 93.3    | (95% CI: 78.7%; 98.2%) | 96.3    | (95% CI: 89.5%; 98.7%) | 56.7    | (95% CI: 28.4%; 80.1%) | 99.6    | (95% CI: 98.8%; 99.9%) |
| maf3307-a001  | TBG Biotechnology Corp                                  | SARS-CoV-2 IgG/IgM Rapid Test Kit                                          | FRS20051K    | Panel 2 | Lateral Flow | Spike and Nucleocapsid | EUA Authorized    | IgM      | 93.3    | (95% CI: 78.7%; 98.2%) | 95.0    | (95% CI: 87.8%; 98.0%) | 49.6    | (95% CI: 25.4%; 72.5%) | 99.6    | (95% CI: 98.7%; 99.9%) |
| maf3308-a001  | Beijing Wantai Biological Pharmacy Enterprise Co., Ltd. | WANTAI SARS-CoV-2 Ab Rapid Test                                            | JNB 20200406 | Panel 2 | Lateral Flow | Spike                  | EUA Authorized    | Combined | 100.0   | (95% CI: 88.6%; 100%)  | 98.8    | (95% CI: 93.3%; 99.8%) | 80.8    | (95% CI: 40.9%; 96.0%) | 100.0   | (95% CI: 99.4%; 100%)  |
| maf3308-a001  | Beijing Wantai Biological Pharmacy Enterprise Co., Ltd. | WANTAI SARS-CoV-2 Ab Rapid Test                                            | JNB 20200406 | Panel 2 | Lateral Flow | Spike                  | EUA Authorized    | Pan Ig   | 100.0   | (95% CI: 88.6%; 100%)  | 98.8    | (95% CI: 93.3%; 99.8%) | 80.8    | (95% CI: 40.9%; 96.0%) | 100.0   | (95% CI: 99.4%; 100%)  |
| maf3313-a001  | Jiangsu Well Biotech Co, Ltd.                           | COVID-19 IgM/IgG Rapid Test (Colloidal gold)                               | 2005202      | Panel 2 | Lateral Flow | Spike                  | EUA Authorized    | Combined | 100.0   | (95% CI: 88.6%; 100%)  | 93.8    | (95% CI: 86.2%; 97.3%) | 45.7    | (95% CI: 25.3%; 66.1%) | 100.0   | (95% CI: 99.3%; 100%)  |
| maf3313-a001  | Jiangsu Well Biotech Co, Ltd.                           | COVID-19 IgM/IgG Rapid Test (Colloidal gold)                               | 2005202      | Panel 2 | Lateral Flow | Spike                  | EUA Authorized    | IgG      | 100.0   | (95% CI: 88.6%; 100%)  | 98.8    | (95% CI: 93.3%; 99.8%) | 80.8    | (95% CI: 40.9%; 96.0%) | 100.0   | (95% CI: 99.4%; 100%)  |
| maf3313-a001  | Jiangsu Well Biotech Co, Ltd.                           | COVID-19 IgM/IgG Rapid Test (Colloidal gold)                               | 2005202      | Panel 2 | Lateral Flow | Spike                  | EUA Authorized    | IgM      | 96.7    | (95% CI: 83.3%; 99.4%) | 95.0    | (95% CI: 87.8%; 98.0%) | 50.4    | (95% CI: 26.5%; 72.7%) | 99.8    | (95% CI: 99.0%; 100%)  |
| maf3318-a001  | Jiangsu Superbio Biomedical (Nanjing) Co Ltd            | SARS-CoV-2 (COVID-19) IgM/IgG Antibody Fast Detection Kit (Colloidal Gold) | SYG202027    | Panel 2 | Lateral Flow | Unknown                | Not Authorized    | Combined | 100.0   | (95% CI: 88.6%; 100%)  | 83.8    | (95% CI: 74.2%; 90.3%) | 24.5    | (95% CI: 15.3%; 35.1%) | 100.0   | (95% CI: 99.2%; 100%)  |
| maf3318-a001  | Jiangsu Superbio Biomedical (Nanjing) Co Ltd            | SARS-CoV-2 (COVID-19) IgM/IgG Antibody Fast Detection Kit (Colloidal Gold) | SYG202027    | Panel 2 | Lateral Flow | Unknown                | Not Authorized    | IgG      | 100.0   | (95% CI: 88.6%; 100%)  | 85.0    | (95% CI: 75.6%; 91.2%) | 26.0    | (95% CI: 16.0%; 37.4%) | 100.0   | (95% CI: 99.2%; 100%)  |
| maf3318-a001  | Jiangsu Superbio Biomedical (Nanjing) Co Ltd            | SARS-CoV-2 (COVID-19) IgM/IgG Antibody Fast Detection Kit (Colloidal Gold) | SYG202027    | Panel 2 | Lateral Flow | Unknown                | Not Authorized    | IgM      | 40.0    | (95% CI: 24.6%; 57.7%) | 98.8    | (95% CI: 93.3%; 99.8%) | 62.7    | (95% CI: 16.1%; 93.2%) | 96.9    | (95% CI: 95.9%; 97.8%) |
| maf3306-a001  | AutoBio Diagnostics Co., LTD                            | Anti-SARS-CoV-2 Rapid Test                                                 | 20E22-J01    | Panel 2 | Lateral Flow | Unknown                | Not Authorized    | Combined | 93.3    | (95% CI: 78.7%; 98.2%) | 98.8    | (95% CI: 93.3%; 99.8%) | 79.7    | (95% CI: 38.0%; 95.9%) | 99.6    | (95% CI: 98.8%; 99.9%) |
| maf3306-a001  | AutoBio Diagnostics Co., LTD                            | Anti-SARS-CoV-2 Rapid Test                                                 | 20E22-J01    | Panel 2 | Lateral Flow | Unknown                | Not Authorized    | IgG      | 93.3    | (95% CI: 78.7%; 98.2%) | 98.8    | (95% CI: 93.3%; 99.8%) | 79.7    | (95% CI: 38.0%; 95.9%) | 99.6    | (95% CI: 98.8%; 99.9%) |
| maf3306-a001  | AutoBio Diagnostics Co., LTD                            | Anti-SARS-CoV-2 Rapid Test                                                 | 20E22-J01    | Panel 2 | Lateral Flow | Unknown                | Not Authorized    | IgM      | 50.0    | (95% CI: 33.2%; 66.8%) | 100.0   | (95% CI: 95.4%; 100%)  | 100.0   | (95% CI: 27.6%; 100%)  | 97.4    | (95% CI: 96.4%; 98.3%) |
| maf3314-a001  | Nirmidas Biotech, Inc                                   | COVID-19 (SARS-CoV-2) IgM/IgG Antibody Detection Kit                       | 15038        | Panel 2 | Lateral Flow | Spike                  | EUA Authorized    | Combined | 93.3    | (95% CI: 78.7%; 98.2%) | 100.0   | (95% CI: 94.8%; 100%)  | 100.0   | (95% CI: 44.3%; 100%)  | 99.7    | (95% CI: 98.8%; 99.9%) |

| Evaluation ID | Manufacturer                                   | Device                                                          | Lot Number    | Panel   | Assay Type   | Target       | Regulatory Status | Analyte  | PPA (%) | PPA CI                 | NPA (%) | NPA CI                 | PPV (%) | PPV CI                 | NPV (%) | NPV CI                 |
|---------------|------------------------------------------------|-----------------------------------------------------------------|---------------|---------|--------------|--------------|-------------------|----------|---------|------------------------|---------|------------------------|---------|------------------------|---------|------------------------|
| maf3314-a001  | Nirmidas Biotech, Inc                          | COVID-19 (SARS-CoV-2) IgM/IgG Antibody Detection Kit            | 15038         | Panel 2 | Lateral Flow | Spike        | EUA Authorized    | IgG      | 86.7    | (95% CI: 70.3%; 94.7%) | 100.0   | (95% CI: 95.4%; 100%)  | 100.0   | (95% CI: 44.7%; 100%)  | 99.3    | (95% CI: 98.4%; 99.7%) |
| maf3314-a001  | Nirmidas Biotech, Inc                          | COVID-19 (SARS-CoV-2) IgM/IgG Antibody Detection Kit            | 15038         | Panel 2 | Lateral Flow | Spike        | EUA Authorized    | IgM      | 93.3    | (95% CI: 78.7%; 98.2%) | 100.0   | (95% CI: 94.8%; 100%)  | 100.0   | (95% CI: 44.3%; 100%)  | 99.7    | (95% CI: 98.8%; 99.9%) |
| maf3321-a001  | Megna Health Inc.                              | Megna Rapid COVID-19 IgM/IgG Combo Test Kit                     | NA            | Panel 2 | Lateral Flow | Nucleocapsid | EUA Authorized    | Combined | 100.0   | (95% CI: 88.6%; 100%)  | 95.0    | (95% CI: 87.8%; 98.0%) | 51.3    | (95% CI: 27.7%; 72.9%) | 100.0   | (95% CI: 99.3%; 100%)  |
| maf3321-a001  | Megna Health Inc.                              | Megna Rapid COVID-19 IgM/IgG Combo Test Kit                     | NA            | Panel 2 | Lateral Flow | Nucleocapsid | EUA Authorized    | IgG      | 100.0   | (95% CI: 88.6%; 100%)  | 97.5    | (95% CI: 91.3%; 99.3%) | 67.8    | (95% CI: 35.0%; 88.4%) | 100.0   | (95% CI: 99.4%; 100%)  |
| maf3321-a001  | Megna Health Inc.                              | Megna Rapid COVID-19 IgM/IgG Combo Test Kit                     | NA            | Panel 2 | Lateral Flow | Nucleocapsid | EUA Authorized    | IgM      | 83.3    | (95% CI: 66.4%; 92.7%) | 97.5    | (95% CI: 91.3%; 99.3%) | 63.7    | (95% CI: 28.8%; 87.6%) | 99.1    | (95% CI: 98.1%; 99.6%) |
| maf3322-a001  | Hangzhou AllTest Biotech Co. Ltd               | 2019-nCoV IgG/IgM Rapid Test Cassette(Whole Blood/Serum/Plasma) | NCP 20050100U | Panel 2 | Lateral Flow | Unknown      | Not Authorized    | Combined | 100.0   | (95% CI: 88.6%; 100%)  | 96.3    | (95% CI: 89.5%; 98.7%) | 58.4    | (95% CI: 30.9%; 80.4%) | 100.0   | (95% CI: 99.3%; 100%)  |
| maf3322-a001  | Hangzhou AllTest Biotech Co. Ltd               | 2019-nCoV IgG/IgM Rapid Test Cassette(Whole Blood/Serum/Plasma) | NCP 20050100U | Panel 2 | Lateral Flow | Unknown      | Not Authorized    | IgG      | 96.7    | (95% CI: 83.3%; 99.4%) | 97.5    | (95% CI: 91.3%; 99.3%) | 67.1    | (95% CI: 33.6%; 88.4%) | 99.8    | (95% CI: 99.0%; 100%)  |
| maf3322-a001  | Hangzhou AllTest Biotech Co. Ltd               | 2019-nCoV IgG/IgM Rapid Test Cassette(Whole Blood/Serum/Plasma) | NCP 20050100U | Panel 2 | Lateral Flow | Unknown      | Not Authorized    | IgM      | 83.3    | (95% CI: 66.4%; 92.7%) | 98.8    | (95% CI: 93.3%; 99.8%) | 77.8    | (95% CI: 34.1%; 95.7%) | 99.1    | (95% CI: 98.1%; 99.6%) |
| maf3323-a001  | Genobio Pharmaceutical Co. Ltd                 | Virusee® COVID-19 IgM/IgG Lateral Flow Assay                    | VMG200331     | Panel 2 | Lateral Flow | Unknown      | Not Authorized    | Combined | 80.0    | (95% CI: 62.7%; 90.5%) | 76.3    | (95% CI: 65.9%; 84.2%) | 15.1    | (95% CI: 8.8%; 23.2%)  | 98.6    | (95% CI: 97.1%; 99.4%) |
| maf3323-a001  | Genobio Pharmaceutical Co. Ltd                 | Virusee® COVID-19 IgM/IgG Lateral Flow Assay                    | VMG200331     | Panel 2 | Lateral Flow | Unknown      | Not Authorized    | IgG      | 63.3    | (95% CI: 45.5%; 78.1%) | 98.8    | (95% CI: 93.3%; 99.8%) | 72.7    | (95% CI: 26.2%; 94.9%) | 98.1    | (95% CI: 97.0%; 98.9%) |
| maf3323-a001  | Genobio Pharmaceutical Co. Ltd                 | Virusee® COVID-19 IgM/IgG Lateral Flow Assay                    | VMG200331     | Panel 2 | Lateral Flow | Unknown      | Not Authorized    | IgM      | 56.7    | (95% CI: 39.2%; 72.6%) | 76.3    | (95% CI: 65.9%; 84.2%) | 11.2    | (95% CI: 5.7%; 19.5%)  | 97.1    | (95% CI: 95.4%; 98.3%) |
| maf3329-a001  | Abbott Rapid Diagnostics Jena GmbH             | COVID-19 IgG Rapid Test Device                                  | COV0062057    | Panel 2 | Lateral Flow | Unknown      | Not Authorized    | Combined | 83.3    | (95% CI: 66.4%; 92.7%) | 100.0   | (95% CI: 95.4%; 100%)  | 100.0   | (95% CI: 43.3%; 100%)  | 99.1    | (95% CI: 98.2%; 99.6%) |
| maf3329-a001  | Abbott Rapid Diagnostics Jena GmbH             | COVID-19 IgG Rapid Test Device                                  | COV0062057    | Panel 2 | Lateral Flow | Unknown      | Not Authorized    | IgG      | 83.3    | (95% CI: 66.4%; 92.7%) | 100.0   | (95% CI: 95.4%; 100%)  | 100.0   | (95% CI: 43.3%; 100%)  | 99.1    | (95% CI: 98.2%; 99.6%) |
| maf3333-a001  | Xiamen AmonMed Biotechnology Co., Ltd          | COVID-19 IgM/IgG Test Kit (colloidal gold)                      | 3120200501    | Panel 2 | Lateral Flow | Unknown      | Not Authorized    | Combined | 93.3    | (95% CI: 78.7%; 98.2%) | 98.8    | (95% CI: 93.3%; 99.8%) | 79.7    | (95% CI: 38.0%; 95.9%) | 99.6    | (95% CI: 98.8%; 99.9%) |
| maf3333-a001  | Xiamen AmonMed Biotechnology Co., Ltd          | COVID-19 IgM/IgG Test Kit (colloidal gold)                      | 3120200501    | Panel 2 | Lateral Flow | Unknown      | Not Authorized    | IgG      | 86.7    | (95% CI: 70.3%; 94.7%) | 98.8    | (95% CI: 93.3%; 99.8%) | 78.5    | (95% CI: 35.4%; 95.8%) | 99.3    | (95% CI: 98.4%; 99.7%) |
| maf3333-a001  | Xiamen AmonMed Biotechnology Co., Ltd          | COVID-19 IgM/IgG Test Kit (colloidal gold)                      | 3120200501    | Panel 2 | Lateral Flow | Unknown      | Not Authorized    | IgM      | 70.0    | (95% CI: 52.1%; 83.3%) | 100.0   | (95% CI: 95.4%; 100%)  | 100.0   | (95% CI: 37.5%; 100%)  | 98.4    | (95% CI: 97.4%; 99.1%) |
| maf3355-a001  | CTK Biotech, Inc.                              | OnSite COVID-19 IgG/IgM Rapid Test                              | F0507R1C00    | Panel 2 | Lateral Flow | Unknown      | Not Authorized    | Combined | 100.0   | (95% CI: 88.6%; 100%)  | 98.8    | (95% CI: 93.3%; 99.8%) | 80.8    | (95% CI: 40.9%; 96.0%) | 100.0   | (95% CI: 99.4%; 100%)  |
| maf3355-a001  | CTK Biotech, Inc.                              | OnSite COVID-19 IgG/IgM Rapid Test                              | F0507R1C00    | Panel 2 | Lateral Flow | Unknown      | Not Authorized    | IgG      | 73.3    | (95% CI: 55.6%; 85.8%) | 100.0   | (95% CI: 95.4%; 100%)  | 100.0   | (95% CI: 39.0%; 100%)  | 98.6    | (95% CI: 97.6%; 99.3%) |
| maf3355-a001  | CTK Biotech, Inc.                              | OnSite COVID-19 IgG/IgM Rapid Test                              | F0507R1C00    | Panel 2 | Lateral Flow | Unknown      | Not Authorized    | IgM      | 96.7    | (95% CI: 83.3%; 99.4%) | 98.8    | (95% CI: 93.3%; 99.8%) | 80.3    | (95% CI: 39.4%; 95.9%) | 99.8    | (95% CI: 99.1%; 100%)  |
| maf3338-a001  | Beijing Kewei Clinical Diagnostic Reagent Inc. | Genonto Rapid Test10 COVID-19 IgG/IgM Rapid Test Kit            | 202004004     | Panel 2 | Lateral Flow | Unknown      | Not Authorized    | Combined | 93.3    | (95% CI: 78.7%; 98.2%) | 91.3    | (95% CI: 83.0%; 95.7%) | 36.0    | (95% CI: 19.6%; 54.6%) | 99.6    | (95% CI: 98.7%; 99.9%) |
| maf3338-a001  | Beijing Kewei Clinical Diagnostic Reagent Inc. | Genonto Rapid Test10 COVID-19 IgG/IgM Rapid Test Kit            | 202004004     | Panel 2 | Lateral Flow | Unknown      | Not Authorized    | IgG      | 93.3    | (95% CI: 78.7%; 98.2%) | 96.3    | (95% CI: 89.5%; 98.7%) | 56.7    | (95% CI: 28.4%; 80.1%) | 99.6    | (95% CI: 98.8%; 99.9%) |

| Evaluation ID | Manufacturer                                   | Device                                               | Lot Number | Panel   | Assay Type   | Target                 | Regulatory Status | Analyte     | PPA (%) | PPA CI                 | NPA (%) | NPA CI                 | PPV (%) | PPV CI                 | NPV (%) | NPV CI                 |
|---------------|------------------------------------------------|------------------------------------------------------|------------|---------|--------------|------------------------|-------------------|-------------|---------|------------------------|---------|------------------------|---------|------------------------|---------|------------------------|
| maf3338-a001  | Beijing Kewei Clinical Diagnostic Reagent Inc. | Genonto Rapid Test10 COVID-19 IgG/IgM Rapid Test Kit | 202004004  | Panel 2 | Lateral Flow | Unknown                | Not Authorized    | IgM         | 93.3    | (95% CI: 78.7%; 98.2%) | 91.3    | (95% CI: 83.0%; 95.7%) | 36.0    | (95% CI: 19.6%; 54.6%) | 99.6    | (95% CI: 98.7%; 99.9%) |
| maf3350-a001  | Polymedco, Inc.                                | Polystat SARS-CoV-2 Antibody Test                    | 20200303   | Panel 2 | Lateral Flow | Unknown                | Not Authorized    | Combined    | 76.7    | (95% CI: 59.1%; 88.2%) | 91.3    | (95% CI: 83.0%; 95.7%) | 31.6    | (95% CI: 15.5%; 51.9%) | 98.7    | (95% CI: 97.5%; 99.4%) |
| maf3350-a001  | Polymedco, Inc.                                | Polystat SARS-CoV-2 Antibody Test                    | 20200303   | Panel 2 | Lateral Flow | Unknown                | Not Authorized    | (IgM / IgA) | 50.0    | (95% CI: 33.2%; 66.8%) | 93.8    | (95% CI: 86.2%; 97.3%) | 29.6    | (95% CI: 11.2%; 56.6%) | 97.3    | (95% CI: 96.1%; 98.2%) |
| maf3350-a001  | Polymedco, Inc.                                | Polystat SARS-CoV-2 Antibody Test                    | 20200303   | Panel 2 | Lateral Flow | Unknown                | Not Authorized    | IgG         | 60.0    | (95% CI: 42.3%; 75.4%) | 97.5    | (95% CI: 91.3%; 99.3%) | 55.8    | (95% CI: 20.5%; 85.2%) | 97.9    | (95% CI: 96.8%; 98.7%) |
| maf3339-a001  | MOKOBIO Biotechnology R&D Center, INC.         | SARS-CoV-2 IgM & IgG Quantum Dot Immunoassay         | 20200324   | Panel 2 | Lateral Flow | Unknown                | Not Authorized    | Combined    | 100.0   | (95% CI: 88.6%; 100%)  | 72.5    | (95% CI: 61.9%; 81.1%) | 16.1    | (95% CI: 10.9%; 21.8%) | 100.0   | (95% CI: 99.0%; 100%)  |
| maf3339-a001  | MOKOBIO Biotechnology R&D Center, INC.         | SARS-CoV-2 IgM & IgG Quantum Dot Immunoassay         | 20200324   | Panel 2 | Lateral Flow | Unknown                | Not Authorized    | IgG         | 93.3    | (95% CI: 78.7%; 98.2%) | 73.8    | (95% CI: 63.2%; 82.1%) | 15.8    | (95% CI: 10.1%; 22.4%) | 99.5    | (95% CI: 98.3%; 99.9%) |
| maf3339-a001  | MOKOBIO Biotechnology R&D Center, INC.         | SARS-CoV-2 IgM & IgG Quantum Dot Immunoassay         | 20200324   | Panel 2 | Lateral Flow | Unknown                | Not Authorized    | IgM         | 66.7    | (95% CI: 48.8%; 80.8%) | 91.3    | (95% CI: 83.0%; 95.7%) | 28.6    | (95% CI: 13.1%; 49.7%) | 98.1    | (95% CI: 96.9%; 99.0%) |
| maf3341-a001  | Changzhou Confucius Biotechnology Co Ltd       | COVID-19 IgG/IgM Rapid Test Cassette (WB/S/P)        | 20200313   | Panel 2 | Lateral Flow | Unknown                | Not Authorized    | Combined    | 96.7    | (95% CI: 83.3%; 99.4%) | 92.5    | (95% CI: 84.6%; 96.5%) | 40.4    | (95% CI: 22.2%; 60.0%) | 99.8    | (95% CI: 99.0%; 100%)  |
| maf3341-a001  | Changzhou Confucius Biotechnology Co Ltd       | COVID-19 IgG/IgM Rapid Test Cassette (WB/S/P)        | 20200313   | Panel 2 | Lateral Flow | Unknown                | Not Authorized    | IgG         | 96.7    | (95% CI: 83.3%; 99.4%) | 96.3    | (95% CI: 89.5%; 98.7%) | 57.6    | (95% CI: 29.6%; 80.3%) | 99.8    | (95% CI: 99.0%; 100%)  |
| maf3341-a001  | Changzhou Confucius Biotechnology Co Ltd       | COVID-19 IgG/IgM Rapid Test Cassette (WB/S/P)        | 20200313   | Panel 2 | Lateral Flow | Unknown                | Not Authorized    | IgM         | 13.3    | (95% CI: 5.3%; 29.7%)  | 95.0    | (95% CI: 87.8%; 98.0%) | 12.3    | (95% CI: 2.2%; 44.3%)  | 95.4    | (95% CI: 94.6%; 96.4%) |
| maf3348-a001  | Sugentech, Inc.                                | SGTI-flex COVID-19 IgG                               | COGT20104  | Panel 2 | Lateral Flow | Spike and Nucleocapsid | EUA Authorized    | Combined    | 96.7    | (95% CI: 83.3%; 99.4%) | 100.0   | (95% CI: 95.4%; 100%)  | 100.0   | (95% CI: 48.9%; 100%)  | 99.8    | (95% CI: 99.1%; 100%)  |
| maf3348-a001  | Sugentech, Inc.                                | SGTI-flex COVID-19 IgG                               | COGT20104  | Panel 2 | Lateral Flow | Spike and Nucleocapsid | EUA Authorized    | IgG         | 96.7    | (95% CI: 83.3%; 99.4%) | 100.0   | (95% CI: 95.4%; 100%)  | 100.0   | (95% CI: 48.9%; 100%)  | 99.8    | (95% CI: 99.1%; 100%)  |
| maf3351-a001  | NanoEntek Inc                                  | FREND™ COVID-19 IgG/IgM Duo test                     | 730023     | Panel 2 | Lateral Flow | Nucleocapsid           | EUA Authorized    | Combined    | 96.7    | (95% CI: 83.3%; 99.4%) | 98.8    | (95% CI: 93.3%; 99.8%) | 80.3    | (95% CI: 39.4%; 95.9%) | 99.8    | (95% CI: 99.1%; 100%)  |
| maf3351-a001  | NanoEntek Inc                                  | FREND™ COVID-19 IgG/IgM Duo test                     | 730023     | Panel 2 | Lateral Flow | Nucleocapsid           | EUA Authorized    | (IgM / IgG) | 96.7    | (95% CI: 83.3%; 99.4%) | 98.8    | (95% CI: 93.3%; 99.8%) | 80.3    | (95% CI: 39.4%; 95.9%) | 99.8    | (95% CI: 99.1%; 100%)  |
| maf3347-a001  | Predictive Laboratories, Inc.                  | Assurance AB COVID-19 IgM/IgG Rapid Antibody Test    | 2020AB12   | Panel 2 | Lateral Flow | Unknown                | Not Authorized    | Combined    | 90.0    | (95% CI: 74.4%; 96.5%) | 100.0   | (95% CI: 95.4%; 100%)  | 100.0   | (95% CI: 46.1%; 100%)  | 99.5    | (95% CI: 98.6%; 99.8%) |
| maf3347-a001  | Predictive Laboratories, Inc.                  | Assurance AB COVID-19 IgM/IgG Rapid Antibody Test    | 2020AB12   | Panel 2 | Lateral Flow | Unknown                | Not Authorized    | IgG         | 90.0    | (95% CI: 74.4%; 96.5%) | 100.0   | (95% CI: 95.4%; 100%)  | 100.0   | (95% CI: 46.1%; 100%)  | 99.5    | (95% CI: 98.6%; 99.8%) |
| maf3347-a001  | Predictive Laboratories, Inc.                  | Assurance AB COVID-19 IgM/IgG Rapid Antibody Test    | 2020AB12   | Panel 2 | Lateral Flow | Unknown                | Not Authorized    | IgM         | 50.0    | (95% CI: 33.2%; 66.8%) | 100.0   | (95% CI: 95.4%; 100%)  | 100.0   | (95% CI: 27.6%; 100%)  | 97.4    | (95% CI: 96.4%; 98.3%) |
| maf3349-a001  | Boditech Med Incorporated                      | iChroma COVID-19 Ab                                  | WHQE88     | Panel 2 | Lateral Flow | Unknown                | Not Authorized    | Combined    | 96.7    | (95% CI: 83.3%; 99.4%) | 95.0    | (95% CI: 87.8%; 98.0%) | 50.4    | (95% CI: 26.5%; 72.7%) | 99.8    | (95% CI: 99.0%; 100%)  |
| maf3349-a001  | Boditech Med Incorporated                      | iChroma COVID-19 Ab                                  | WHQE88     | Panel 2 | Lateral Flow | Unknown                | Not Authorized    | IgG         | 96.7    | (95% CI: 83.3%; 99.4%) | 96.3    | (95% CI: 89.5%; 98.7%) | 57.6    | (95% CI: 29.6%; 80.3%) | 99.8    | (95% CI: 99.0%; 100%)  |
| maf3349-a001  | Boditech Med Incorporated                      | iChroma COVID-19 Ab                                  | WHQE88     | Panel 2 | Lateral Flow | Unknown                | Not Authorized    | IgM         | 13.3    | (95% CI: 5.3%; 29.7%)  | 98.8    | (95% CI: 93.3%; 99.8%) | 36.0    | (95% CI: 4.0%; 87.6%)  | 95.6    | (95% CI: 94.9%; 96.4%) |
| maf3396-a001  | Acon Biotech (Hangzhou) Co., LTD               | Acon SARS-CoV2 IgG/IgM Rapid Test                    | COV0109007 | Panel 2 | Lateral Flow | Spike and Nucleocapsid | EUA Authorized    | Combined    | 100.0   | (95% CI: 88.6%; 100%)  | 96.3    | (95% CI: 89.5%; 98.7%) | 58.4    | (95% CI: 30.9%; 80.4%) | 100.0   | (95% CI: 99.3%; 100%)  |
| maf3396-a001  | Acon Biotech (Hangzhou) Co., LTD               | Acon SARS-CoV2 IgG/IgM Rapid Test                    | COV0109007 | Panel 2 | Lateral Flow | Spike and Nucleocapsid | EUA Authorized    | IgG         | 100.0   | (95% CI: 88.6%; 100%)  | 97.5    | (95% CI: 91.3%; 99.3%) | 67.8    | (95% CI: 35.0%; 88.4%) | 100.0   | (95% CI: 99.4%; 100%)  |
| maf3396-a001  | Acon Biotech (Hangzhou) Co., LTD               | Acon SARS-CoV2 IgG/IgM Rapid Test                    | COV0109007 | Panel 2 | Lateral Flow | Spike and Nucleocapsid | EUA Authorized    | IgM         | 96.7    | (95% CI: 83.3%; 99.4%) | 98.8    | (95% CI: 93.3%; 99.8%) | 80.3    | (95% CI: 39.4%; 95.9%) | 99.8    | (95% CI: 99.1%; 100%)  |

| Evaluation ID | Manufacturer                               | Device                                                            | Lot Number     | Panel   | Assay Type   | Target  | Regulatory Status | Analyte     | PPA (%) | PPA CI                 | NPA (%) | NPA CI                 | PPV (%) | PPV CI                 | NPV (%) | NPV CI                 |
|---------------|--------------------------------------------|-------------------------------------------------------------------|----------------|---------|--------------|---------|-------------------|-------------|---------|------------------------|---------|------------------------|---------|------------------------|---------|------------------------|
| maf3371-a001  | Ortho-Clinical Diagnostics, Inc.           | VITROS Immunodiagnostic Products Anti-SARS-CoV-2 IgG Reagent Pack | 130            | Panel 3 | CIA          | Spike   | EUA Authorized    | Combined    | 100.0   | (95% CI: 88.6%; 100%)  | 100.0   | (95% CI: 95.4%; 100%)  | 100.0   | (95% CI: 50.5%; 100%)  | 100.0   | (95% CI: 99.4%; 100%)  |
| maf3371-a001  | Ortho-Clinical Diagnostics, Inc.           | VITROS Immunodiagnostic Products Anti-SARS-CoV-2 IgG Reagent Pack | 130            | Panel 3 | CIA          | Spike   | EUA Authorized    | IgG         | 100.0   | (95% CI: 88.6%; 100%)  | 100.0   | (95% CI: 95.4%; 100%)  | 100.0   | (95% CI: 50.5%; 100%)  | 100.0   | (95% CI: 99.4%; 100%)  |
| maf3362-a001  | Fisher Diagnostics                         | OmnipATH COVID-19 Total Antibody ELISA Test                       | 20200523       | Panel 3 | ELISA        | Spike   | EUA Authorized    | Combined    | 96.7    | (95% CI: 83.3%; 99.4%) | 97.5    | (95% CI: 91.3%; 99.3%) | 67.1    | (95% CI: 33.6%; 88.4%) | 99.8    | (95% CI: 99.0%; 100%)  |
| maf3362-a001  | Fisher Diagnostics                         | OmnipATH COVID-19 Total Antibody ELISA Test                       | 20200523       | Panel 3 | ELISA        | Spike   | EUA Authorized    | Pan Ig      | 96.7    | (95% CI: 83.3%; 99.4%) | 97.5    | (95% CI: 91.3%; 99.3%) | 67.1    | (95% CI: 33.6%; 88.4%) | 99.8    | (95% CI: 99.0%; 100%)  |
| maf3377-a001  | EUROIMMUN Medizinische Labordiagnostika AG | Anti-SARS-CoV-2-NCP ELISA (IgM)                                   | E200703AO      | Panel 3 | ELISA        | Unknown | Not Authorized    | Combined    | 30.0    | (95% CI: 16.7%; 47.9%) | 100.0   | (95% CI: 94.8%; 100%)  | 100.0   | (95% CI: 14.4%; 100%)  | 96.4    | (95% CI: 95.6%; 97.3%) |
| maf3377-a001  | EUROIMMUN Medizinische Labordiagnostika AG | Anti-SARS-CoV-2-NCP ELISA (IgM)                                   | E200703AO      | Panel 3 | ELISA        | Unknown | Not Authorized    | IgM         | 30.0    | (95% CI: 16.7%; 47.9%) | 100.0   | (95% CI: 94.8%; 100%)  | 100.0   | (95% CI: 14.4%; 100%)  | 96.4    | (95% CI: 95.6%; 97.3%) |
| maf3387-a001  | Plexense, Inc.                             | ACCEL ELISA COVID-19                                              | PXCOV 061820   | Panel 3 | ELISA        | Unknown | Not Authorized    | Combined    | 73.3    | (95% CI: 55.6%; 85.8%) | 100.0   | (95% CI: 95.4%; 100%)  | 100.0   | (95% CI: 39.0%; 100%)  | 98.6    | (95% CI: 97.6%; 99.3%) |
| maf3387-a001  | Plexense, Inc.                             | ACCEL ELISA COVID-19                                              | PXCOV 061820   | Panel 3 | ELISA        | Unknown | Not Authorized    | Pan Ig      | 73.3    | (95% CI: 55.6%; 85.8%) | 100.0   | (95% CI: 95.4%; 100%)  | 100.0   | (95% CI: 39.0%; 100%)  | 98.6    | (95% CI: 97.6%; 99.3%) |
| maf3354-a001  | Nirmidas Biotech, Inc                      | COVID-19 (SARS-CoV-2) IgM/IgG Antibody Detection Kit              | 15038          | Panel 3 | Lateral Flow | Spike   | EUA Authorized    | Combined    | 96.7    | (95% CI: 83.3%; 99.4%) | 97.5    | (95% CI: 91.3%; 99.3%) | 67.1    | (95% CI: 33.6%; 88.4%) | 99.8    | (95% CI: 99.0%; 100%)  |
| maf3354-a001  | Nirmidas Biotech, Inc                      | COVID-19 (SARS-CoV-2) IgM/IgG Antibody Detection Kit              | 15038          | Panel 3 | Lateral Flow | Spike   | EUA Authorized    | IgG         | 86.7    | (95% CI: 70.3%; 94.7%) | 100.0   | (95% CI: 95.4%; 100%)  | 100.0   | (95% CI: 44.7%; 100%)  | 99.3    | (95% CI: 98.4%; 99.7%) |
| maf3354-a001  | Nirmidas Biotech, Inc                      | COVID-19 (SARS-CoV-2) IgM/IgG Antibody Detection Kit              | 15038          | Panel 3 | Lateral Flow | Spike   | EUA Authorized    | IgM         | 90.0    | (95% CI: 74.4%; 96.5%) | 97.5    | (95% CI: 91.3%; 99.3%) | 65.5    | (95% CI: 31.1%; 88.1%) | 99.5    | (95% CI: 98.5%; 99.8%) |
| maf3356-a001  | Jiangsu Well Biotech Co., Ltd.             | COVID-19 IgM/IgG Rapid Test                                       | 2005202        | Panel 3 | Lateral Flow | Spike   | EUA Authorized    | Combined    | 100.0   | (95% CI: 88.6%; 100%)  | 100.0   | (95% CI: 95.4%; 100%)  | 100.0   | (95% CI: 50.5%; 100%)  | 100.0   | (95% CI: 99.4%; 100%)  |
| maf3356-a001  | Jiangsu Well Biotech Co., Ltd.             | COVID-19 IgM/IgG Rapid Test                                       | 2005202        | Panel 3 | Lateral Flow | Spike   | EUA Authorized    | IgG         | 100.0   | (95% CI: 88.6%; 100%)  | 100.0   | (95% CI: 95.4%; 100%)  | 100.0   | (95% CI: 50.5%; 100%)  | 100.0   | (95% CI: 99.4%; 100%)  |
| maf3356-a001  | Jiangsu Well Biotech Co., Ltd.             | COVID-19 IgM/IgG Rapid Test                                       | 2005202        | Panel 3 | Lateral Flow | Spike   | EUA Authorized    | IgM         | 90.0    | (95% CI: 74.4%; 96.5%) | 100.0   | (95% CI: 95.4%; 100%)  | 100.0   | (95% CI: 46.1%; 100%)  | 99.5    | (95% CI: 98.6%; 99.8%) |
| maf3373-a001  | Shenzhen JetMay Care Limited               | COVID-19 IgM & IgG Test                                           | 20200401       | Panel 3 | Lateral Flow | Unknown | Not Authorized    | Combined    | 66.7    | (95% CI: 48.8%; 80.8%) | 100.0   | (95% CI: 95.4%; 100%)  | 100.0   | (95% CI: 35.9%; 100%)  | 98.3    | (95% CI: 97.3%; 99.0%) |
| maf3373-a001  | Shenzhen JetMay Care Limited               | COVID-19 IgM & IgG Test                                           | 20200401       | Panel 3 | Lateral Flow | Unknown | Not Authorized    | IgG         | 56.7    | (95% CI: 39.2%; 72.6%) | 100.0   | (95% CI: 95.4%; 100%)  | 100.0   | (95% CI: 31.0%; 100%)  | 97.8    | (95% CI: 96.8%; 98.6%) |
| maf3373-a001  | Shenzhen JetMay Care Limited               | COVID-19 IgM & IgG Test                                           | 20200401       | Panel 3 | Lateral Flow | Unknown | Not Authorized    | IgM         | 53.3    | (95% CI: 36.1%; 69.8%) | 100.0   | (95% CI: 95.4%; 100%)  | 100.0   | (95% CI: 29.3%; 100%)  | 97.6    | (95% CI: 96.6%; 98.4%) |
| maf3375-a001  | Accel Diagnostics, LLC                     | Rapid C2T Total Antibodies (IgG/IgM) Card                         | 07.20.005      | Panel 3 | Lateral Flow | Unknown | Not Authorized    | Combined    | 70.0    | (95% CI: 52.1%; 83.3%) | 60.0    | (95% CI: 49.0%; 70.0%) | 8.4     | (95% CI: 5.1%; 12.8%)  | 97.4    | (95% CI: 95.1%; 98.8%) |
| maf3375-a001  | Accel Diagnostics, LLC                     | Rapid C2T Total Antibodies (IgG/IgM) Card                         | 07.20.005      | Panel 3 | Lateral Flow | Unknown | Not Authorized    | (IgM / IgG) | 70.0    | (95% CI: 52.1%; 83.3%) | 60.0    | (95% CI: 49.0%; 70.0%) | 8.4     | (95% CI: 5.1%; 12.8%)  | 97.4    | (95% CI: 95.1%; 98.8%) |
| maf3378-a001  | Top Biotech Sdn. Bhd.                      | Top Rapid COVID-19 Rapid Antibody IgG/IgM Test Kit                | TBCV 04007001T | Panel 3 | Lateral Flow | Unknown | Not Authorized    | Combined    | 100.0   | (95% CI: 88.6%; 100%)  | 90.0    | (95% CI: 81.5%; 94.8%) | 34.5    | (95% CI: 20.1%; 50.5%) | 100.0   | (95% CI: 99.3%; 100%)  |
| maf3378-a001  | Top Biotech Sdn. Bhd.                      | Top Rapid COVID-19 Rapid Antibody IgG/IgM Test Kit                | TBCV 04007001T | Panel 3 | Lateral Flow | Unknown | Not Authorized    | IgG         | 83.3    | (95% CI: 66.4%; 92.7%) | 100.0   | (95% CI: 95.4%; 100%)  | 100.0   | (95% CI: 43.3%; 100%)  | 99.1    | (95% CI: 98.2%; 99.6%) |
| maf3378-a001  | Top Biotech Sdn. Bhd.                      | Top Rapid COVID-19 Rapid Antibody IgG/IgM Test Kit                | TBCV 04007001T | Panel 3 | Lateral Flow | Unknown | Not Authorized    | IgM         | 93.3    | (95% CI: 78.7%; 98.2%) | 90.0    | (95% CI: 81.5%; 94.8%) | 32.9    | (95% CI: 18.3%; 50.1%) | 99.6    | (95% CI: 98.6%; 99.9%) |



| Evaluation ID | Manufacturer                          | Device                                                               | Lot Number | Panel   | Assay Type   | Target  | Regulatory Status | Analyte  | PPA (%) | PPA CI                 | NPA (%) | NPA CI                 | PPV (%) | PPV CI                 | NPV (%) | NPV CI                 |
|---------------|---------------------------------------|----------------------------------------------------------------------|------------|---------|--------------|---------|-------------------|----------|---------|------------------------|---------|------------------------|---------|------------------------|---------|------------------------|
| maf3383-a001  | Doctorspot Technologies Inc.          | COVID-19 SARS-CoV-2 IgM/IgG Antibody Rapid Test Kit (Colloidal Gold) | S060012010 | Panel 3 | Lateral Flow | Unknown | Not Authorized    | Combined | 33.3    | (95% CI: 19.2%; 51.2%) | 100.0   | (95% CI: 95.4%; 100%)  | 100.0   | (95% CI: 18.1%; 100%)  | 96.6    | (95% CI: 95.7%; 97.5%) |
| maf3383-a001  | Doctorspot Technologies Inc.          | COVID-19 SARS-CoV-2 IgM/IgG Antibody Rapid Test Kit (Colloidal Gold) | S060012010 | Panel 3 | Lateral Flow | Unknown | Not Authorized    | IgG      | 26.7    | (95% CI: 14.2%; 44.4%) | 100.0   | (95% CI: 95.4%; 100%)  | 100.0   | (95% CI: 14.0%; 100%)  | 96.3    | (95% CI: 95.5%; 97.2%) |
| maf3383-a001  | Doctorspot Technologies Inc.          | COVID-19 SARS-CoV-2 IgM/IgG Antibody Rapid Test Kit (Colloidal Gold) | S060012010 | Panel 3 | Lateral Flow | Unknown | Not Authorized    | IgM      | 16.7    | (95% CI: 7.3%; 33.6%)  | 100.0   | (95% CI: 95.4%; 100%)  | 100.0   | (95% CI: 7.8%; 100%)   | 95.8    | (95% CI: 95.1%; 96.6%) |
| maf3390-a001  | Artron Laboratories, Inc.             | OTO-Artron COVID-19 IgG/IgM Antibody Test                            | 200606     | Panel 3 | Lateral Flow | Unknown | Not Authorized    | Combined | 93.3    | (95% CI: 78.7%; 98.2%) | 100.0   | (95% CI: 95.4%; 100%)  | 100.0   | (95% CI: 47.5%; 100%)  | 99.7    | (95% CI: 98.8%; 99.9%) |
| maf3390-a001  | Artron Laboratories, Inc.             | OTO-Artron COVID-19 IgG/IgM Antibody Test                            | 200606     | Panel 3 | Lateral Flow | Unknown | Not Authorized    | IgG      | 83.3    | (95% CI: 66.4%; 92.7%) | 100.0   | (95% CI: 95.4%; 100%)  | 100.0   | (95% CI: 43.3%; 100%)  | 99.1    | (95% CI: 98.2%; 99.6%) |
| maf3390-a001  | Artron Laboratories, Inc.             | OTO-Artron COVID-19 IgG/IgM Antibody Test                            | 200606     | Panel 3 | Lateral Flow | Unknown | Not Authorized    | IgM      | 76.7    | (95% CI: 59.1%; 88.2%) | 100.0   | (95% CI: 95.4%; 100%)  | 100.0   | (95% CI: 40.4%; 100%)  | 98.8    | (95% CI: 97.8%; 99.4%) |
| maf3391-a001  | SurExam Bio-Tech Co. Ltd.             | Surplex COVID-19 IgM/IgG Rapid Test                                  | 20052901   | Panel 3 | Lateral Flow | Unknown | Not Authorized    | Combined | 76.7    | (95% CI: 59.1%; 88.2%) | 100.0   | (95% CI: 95.4%; 100%)  | 100.0   | (95% CI: 40.4%; 100%)  | 98.8    | (95% CI: 97.8%; 99.4%) |
| maf3391-a001  | SurExam Bio-Tech Co. Ltd.             | Surplex COVID-19 IgM/IgG Rapid Test                                  | 20052901   | Panel 3 | Lateral Flow | Unknown | Not Authorized    | IgG      | 76.7    | (95% CI: 59.1%; 88.2%) | 100.0   | (95% CI: 95.4%; 100%)  | 100.0   | (95% CI: 40.4%; 100%)  | 98.8    | (95% CI: 97.8%; 99.4%) |
| maf3391-a001  | SurExam Bio-Tech Co. Ltd.             | Surplex COVID-19 IgM/IgG Rapid Test                                  | 20052901   | Panel 3 | Lateral Flow | Unknown | Not Authorized    | IgM      | 76.7    | (95% CI: 59.1%; 88.2%) | 100.0   | (95% CI: 95.4%; 100%)  | 100.0   | (95% CI: 40.4%; 100%)  | 98.8    | (95% CI: 97.8%; 99.4%) |
| maf3394-a001  | Vincitek LLC                          | Vincitek S2-AB Test Card                                             | S2AB200914 | Panel 3 | Lateral Flow | Unknown | Not Authorized    | Combined | 83.3    | (95% CI: 66.4%; 92.7%) | 100.0   | (95% CI: 95.4%; 100%)  | 100.0   | (95% CI: 43.3%; 100%)  | 99.1    | (95% CI: 98.2%; 99.6%) |
| maf3394-a001  | Vincitek LLC                          | Vincitek S2-AB Test Card                                             | S2AB200914 | Panel 3 | Lateral Flow | Unknown | Not Authorized    | IgG      | 83.3    | (95% CI: 66.4%; 92.7%) | 100.0   | (95% CI: 95.4%; 100%)  | 100.0   | (95% CI: 43.3%; 100%)  | 99.1    | (95% CI: 98.2%; 99.6%) |
| maf3394-a001  | Vincitek LLC                          | Vincitek S2-AB Test Card                                             | S2AB200914 | Panel 3 | Lateral Flow | Unknown | Not Authorized    | IgM      | 53.3    | (95% CI: 36.1%; 69.8%) | 100.0   | (95% CI: 95.4%; 100%)  | 100.0   | (95% CI: 29.3%; 100%)  | 97.6    | (95% CI: 96.6%; 98.4%) |
| maf3398-a001  | MP Biomedicals Asia Pacific Pte. Ltd. | MP Diagnostics Assure SARS-CoV-2 IgG/IgM Rapid Test                  | DC0005     | Panel 3 | Lateral Flow | Unknown | Not Authorized    | Combined | 96.7    | (95% CI: 83.3%; 99.4%) | 88.8    | (95% CI: 80.0%; 94.0%) | 31.1    | (95% CI: 18.0%; 46.4%) | 99.8    | (95% CI: 98.9%; 100%)  |
| maf3398-a001  | MP Biomedicals Asia Pacific Pte. Ltd. | MP Diagnostics Assure SARS-CoV-2 IgG/IgM Rapid Test                  | DC0005     | Panel 3 | Lateral Flow | Unknown | Not Authorized    | IgG      | 96.7    | (95% CI: 83.3%; 99.4%) | 91.3    | (95% CI: 83.0%; 95.7%) | 36.8    | (95% CI: 20.5%; 54.9%) | 99.8    | (95% CI: 99.0%; 100%)  |
| maf3398-a001  | MP Biomedicals Asia Pacific Pte. Ltd. | MP Diagnostics Assure SARS-CoV-2 IgG/IgM Rapid Test                  | DC0005     | Panel 3 | Lateral Flow | Unknown | Not Authorized    | IgM      | 66.7    | (95% CI: 48.8%; 80.8%) | 97.5    | (95% CI: 91.3%; 99.3%) | 58.4    | (95% CI: 22.9%; 86.1%) | 98.2    | (95% CI: 97.1%; 99.0%) |

PPA= Positive Percent Agreement

NPA= Negative Percent Agreement

CI= Confidence Interval

PPV= Positive Predictive Value

NPV= Negative Predictive Value
